# Supplementary material for: Estimating biological accuracy of DSM for attention deficit/hyperactivity disorder based on multivariate analysis for small samples
Source: PeerJ journal article supplement (doi:10.7717/peerj.7074), 2019-06-12

F7

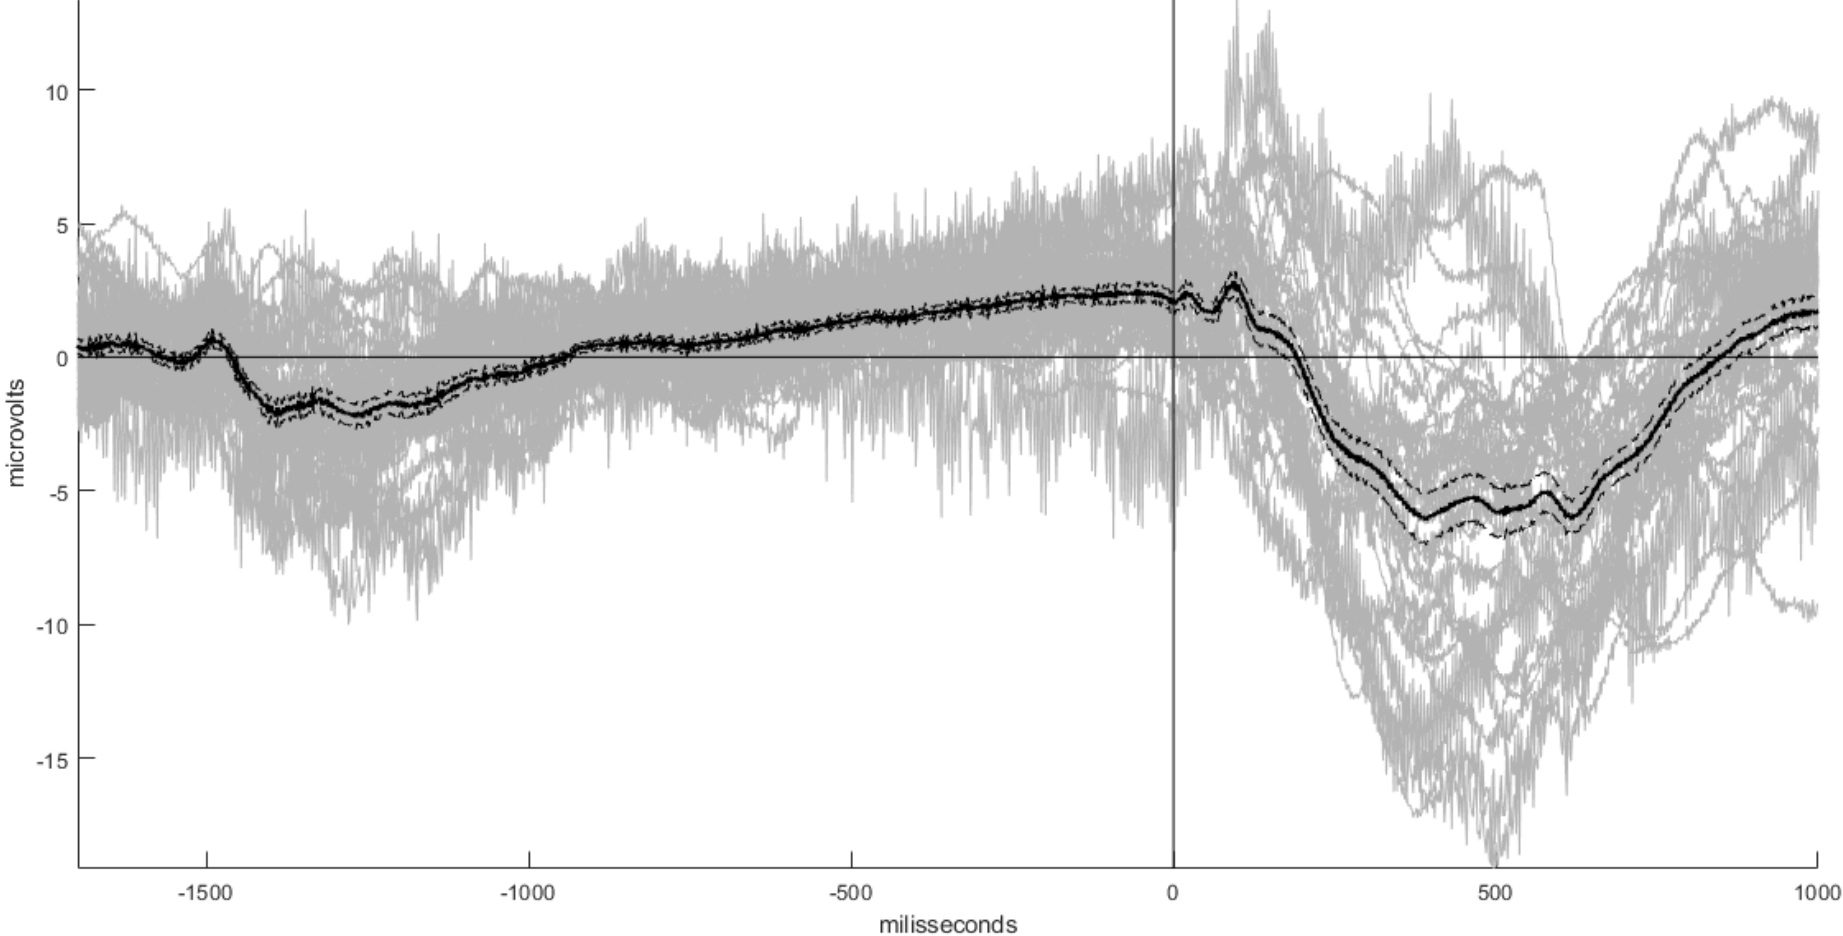

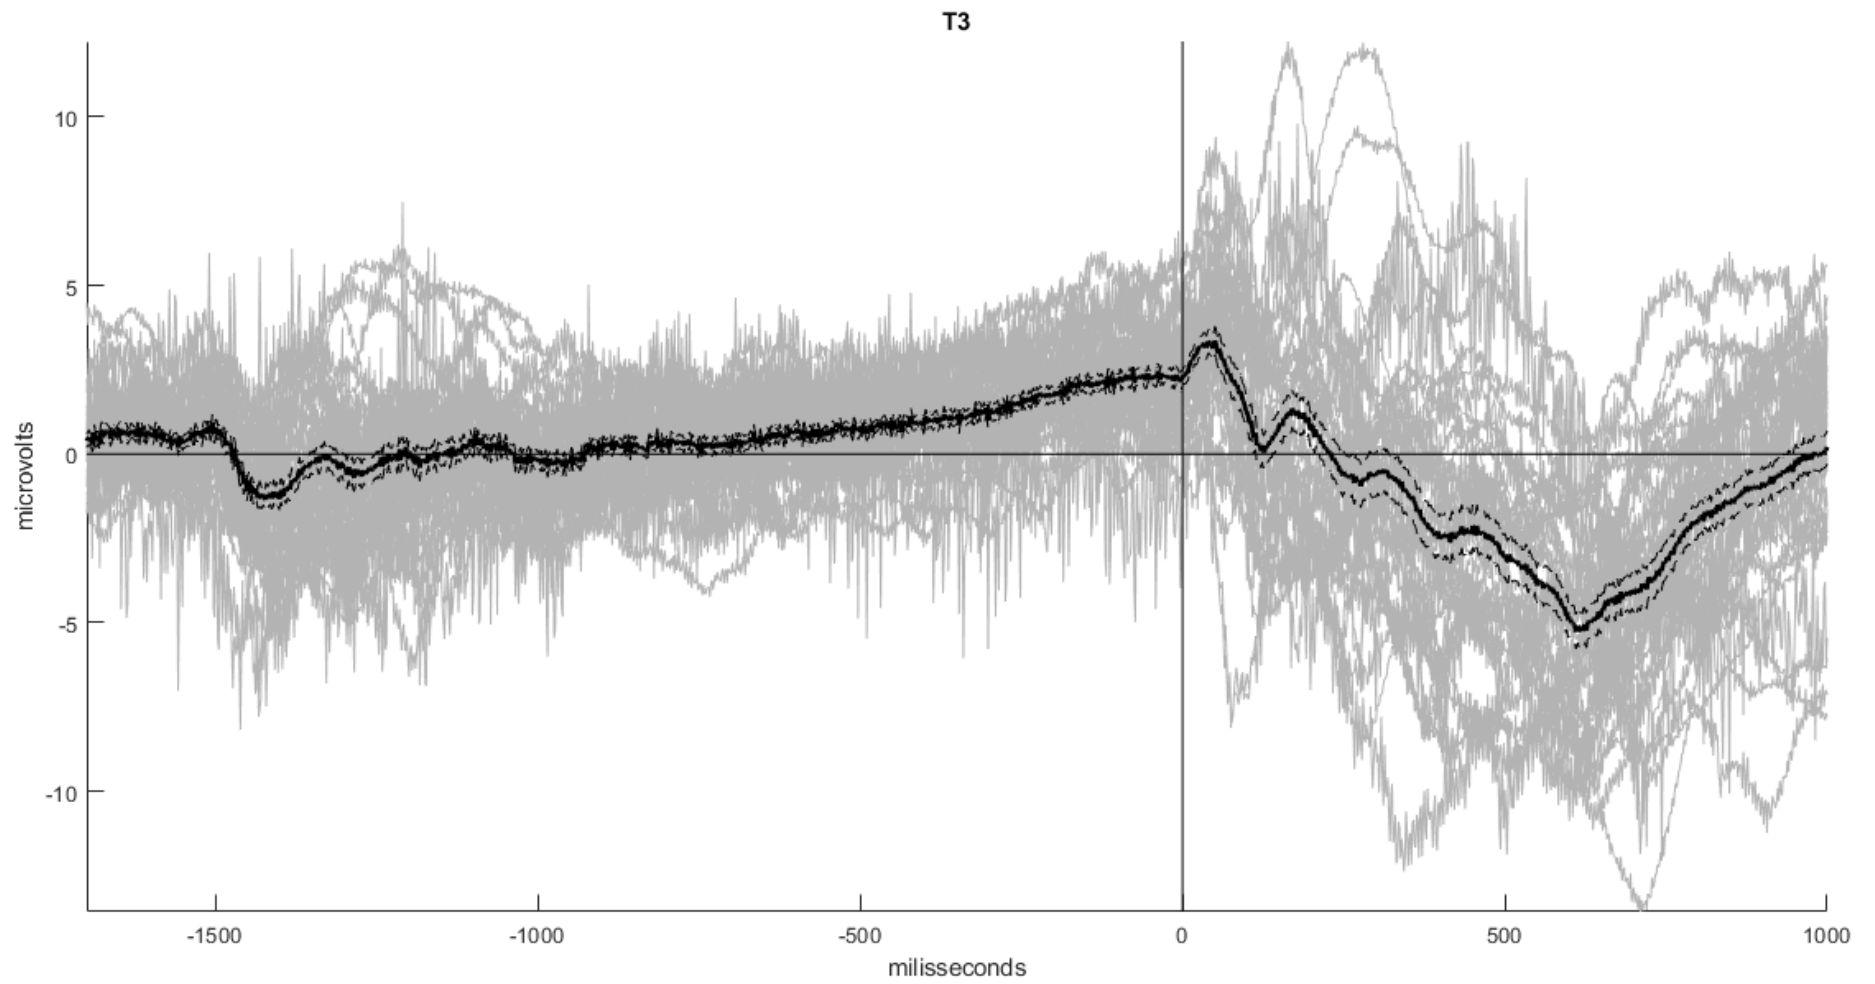

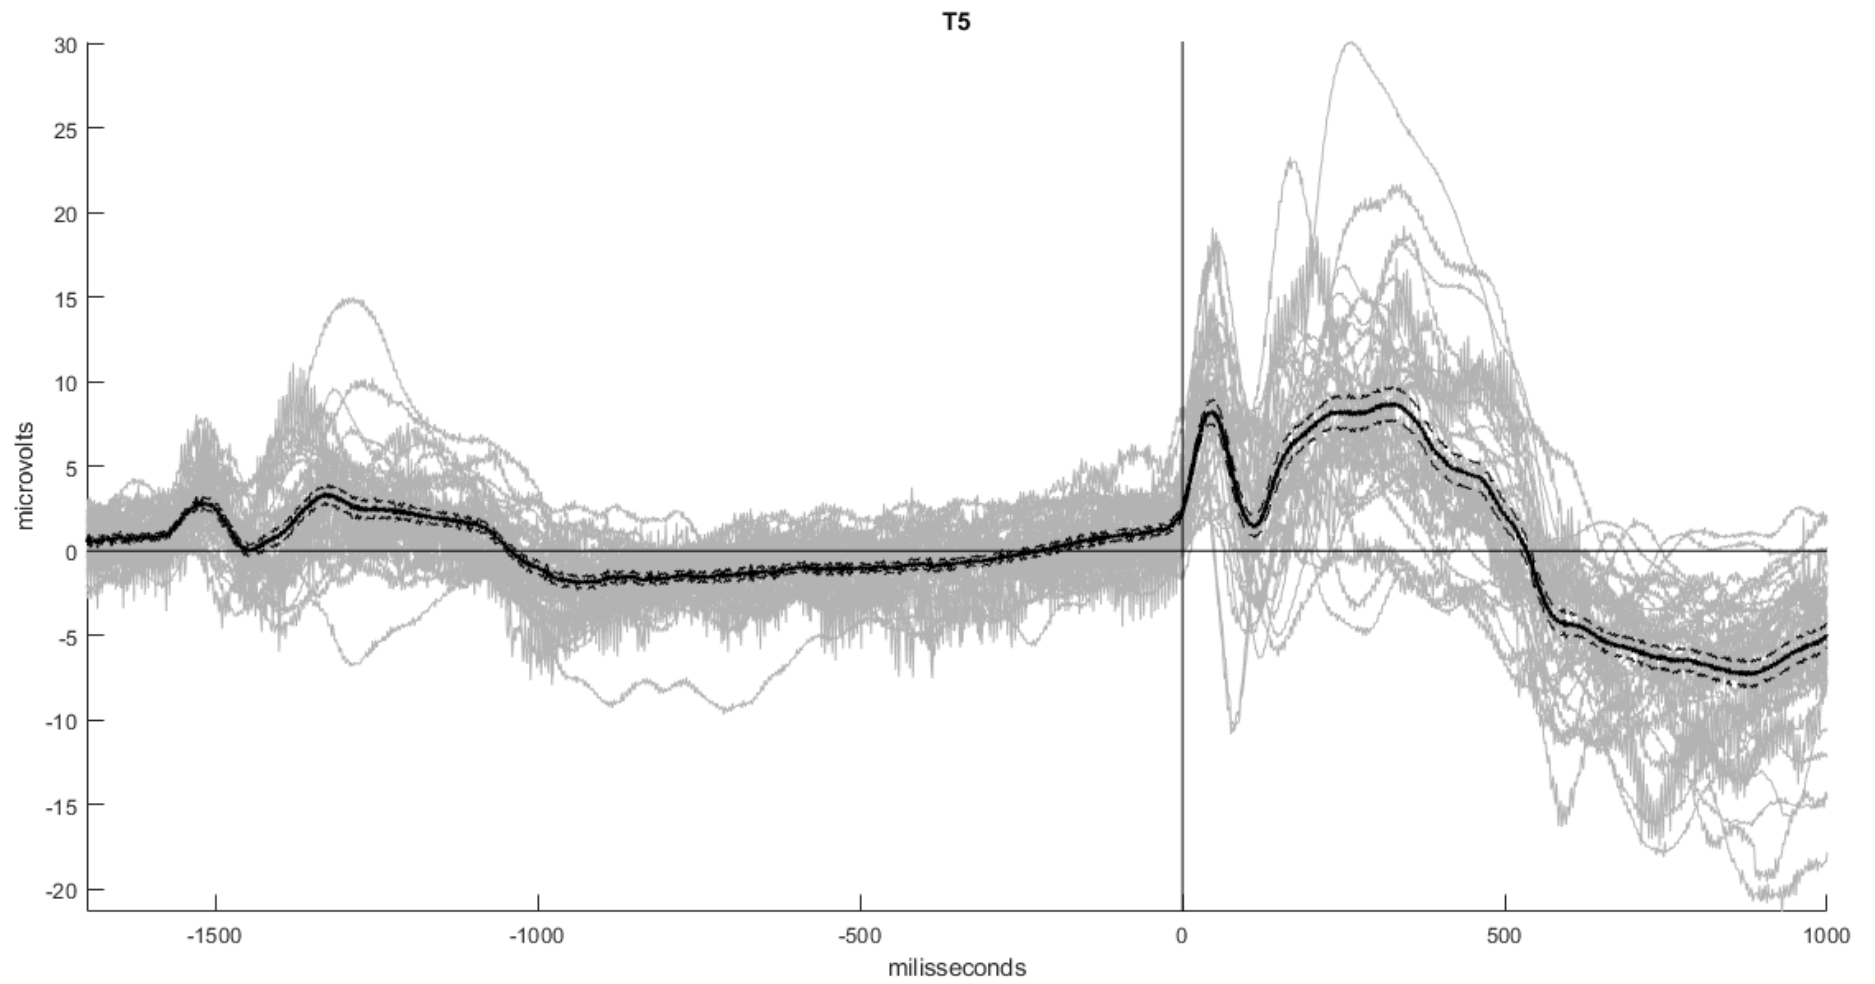

Fp1

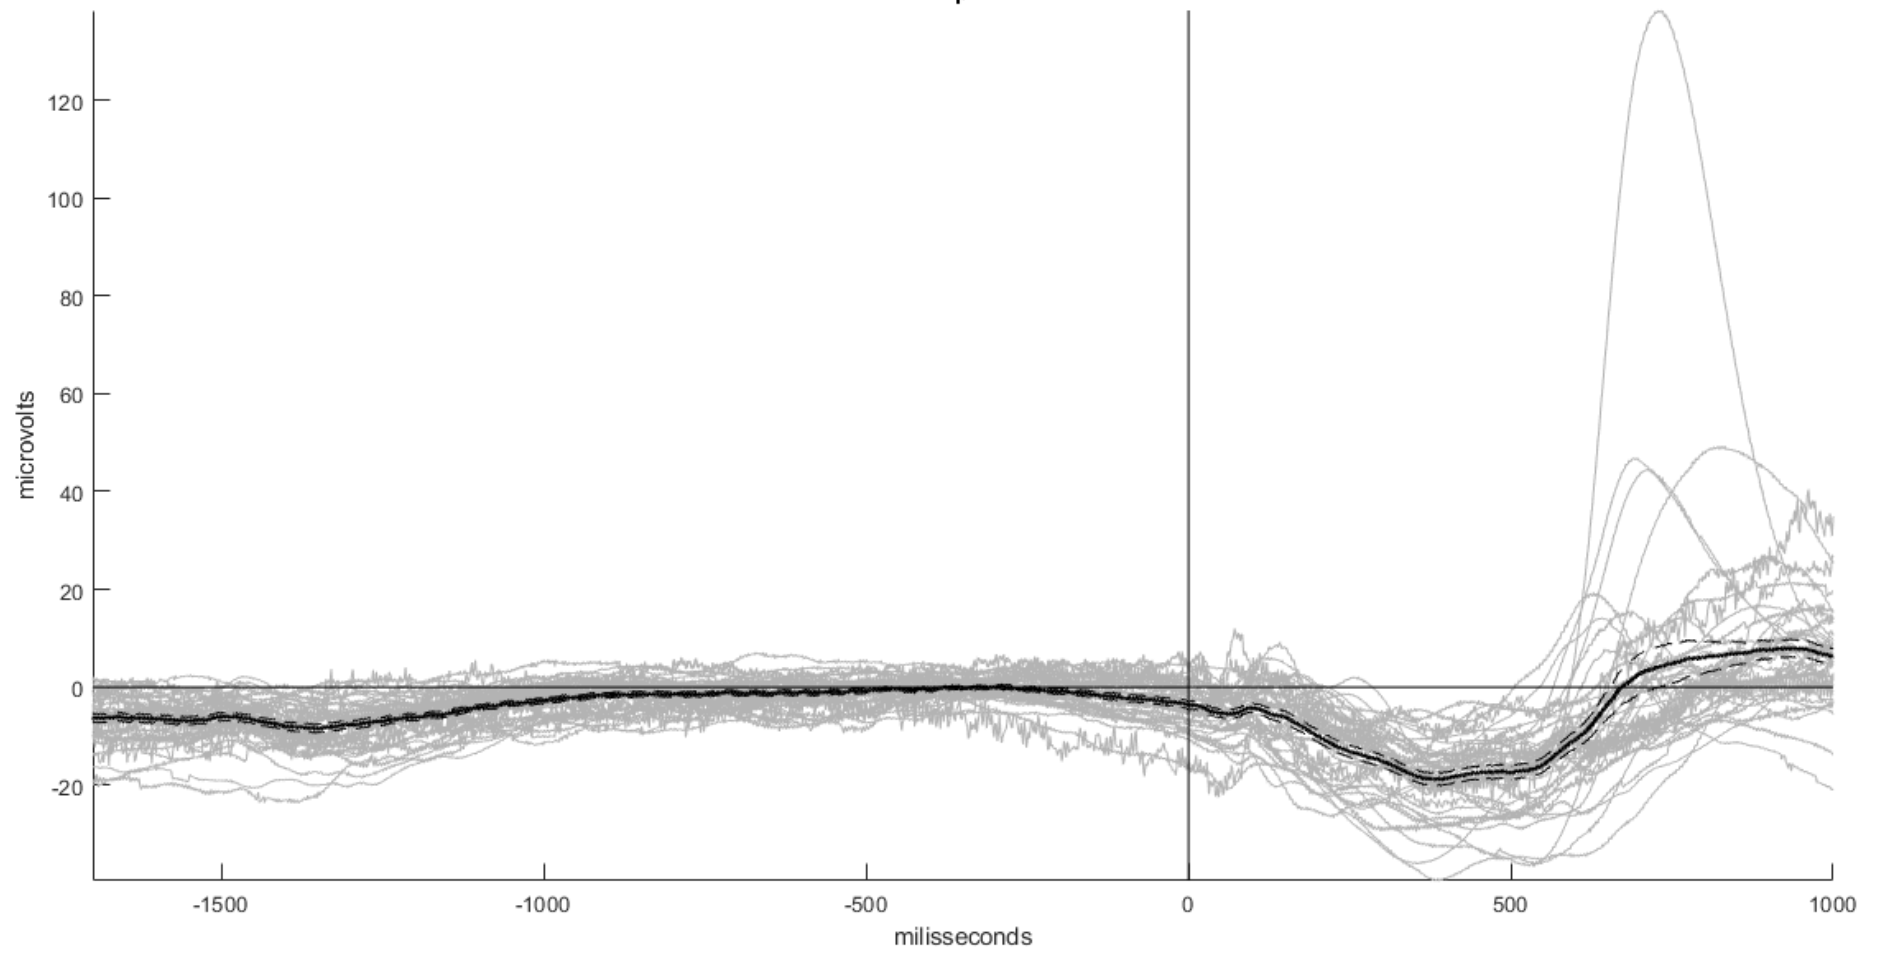

F3

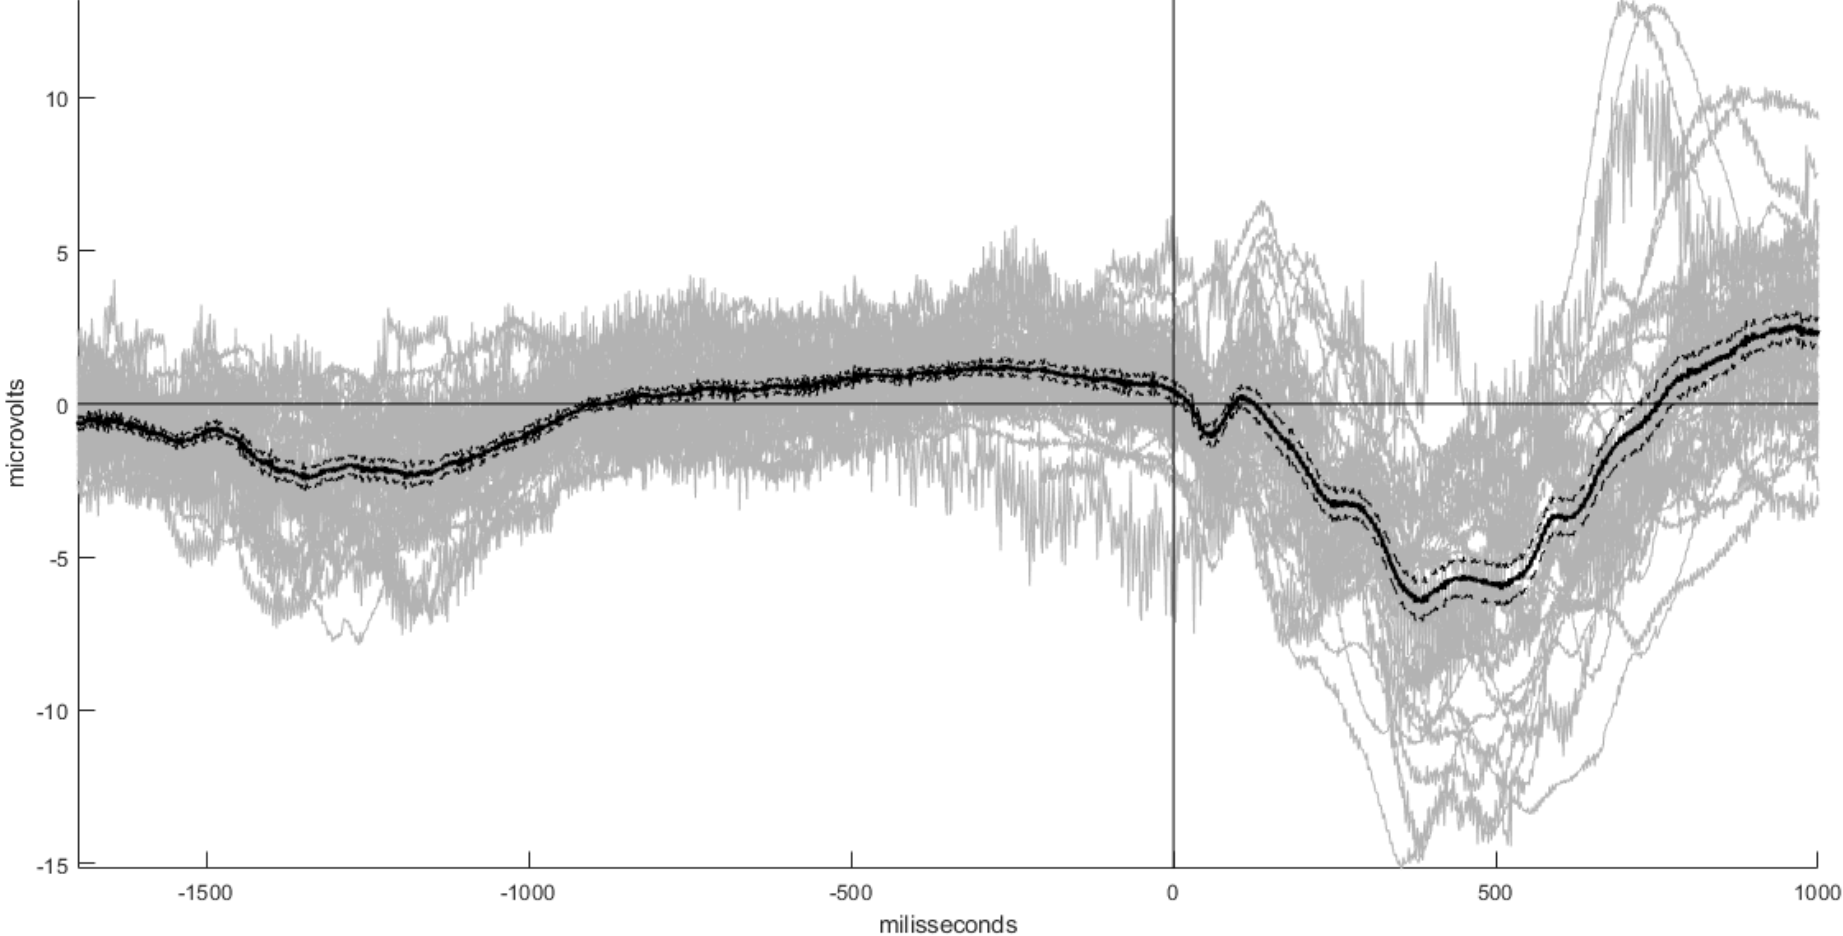

**C3-C4**

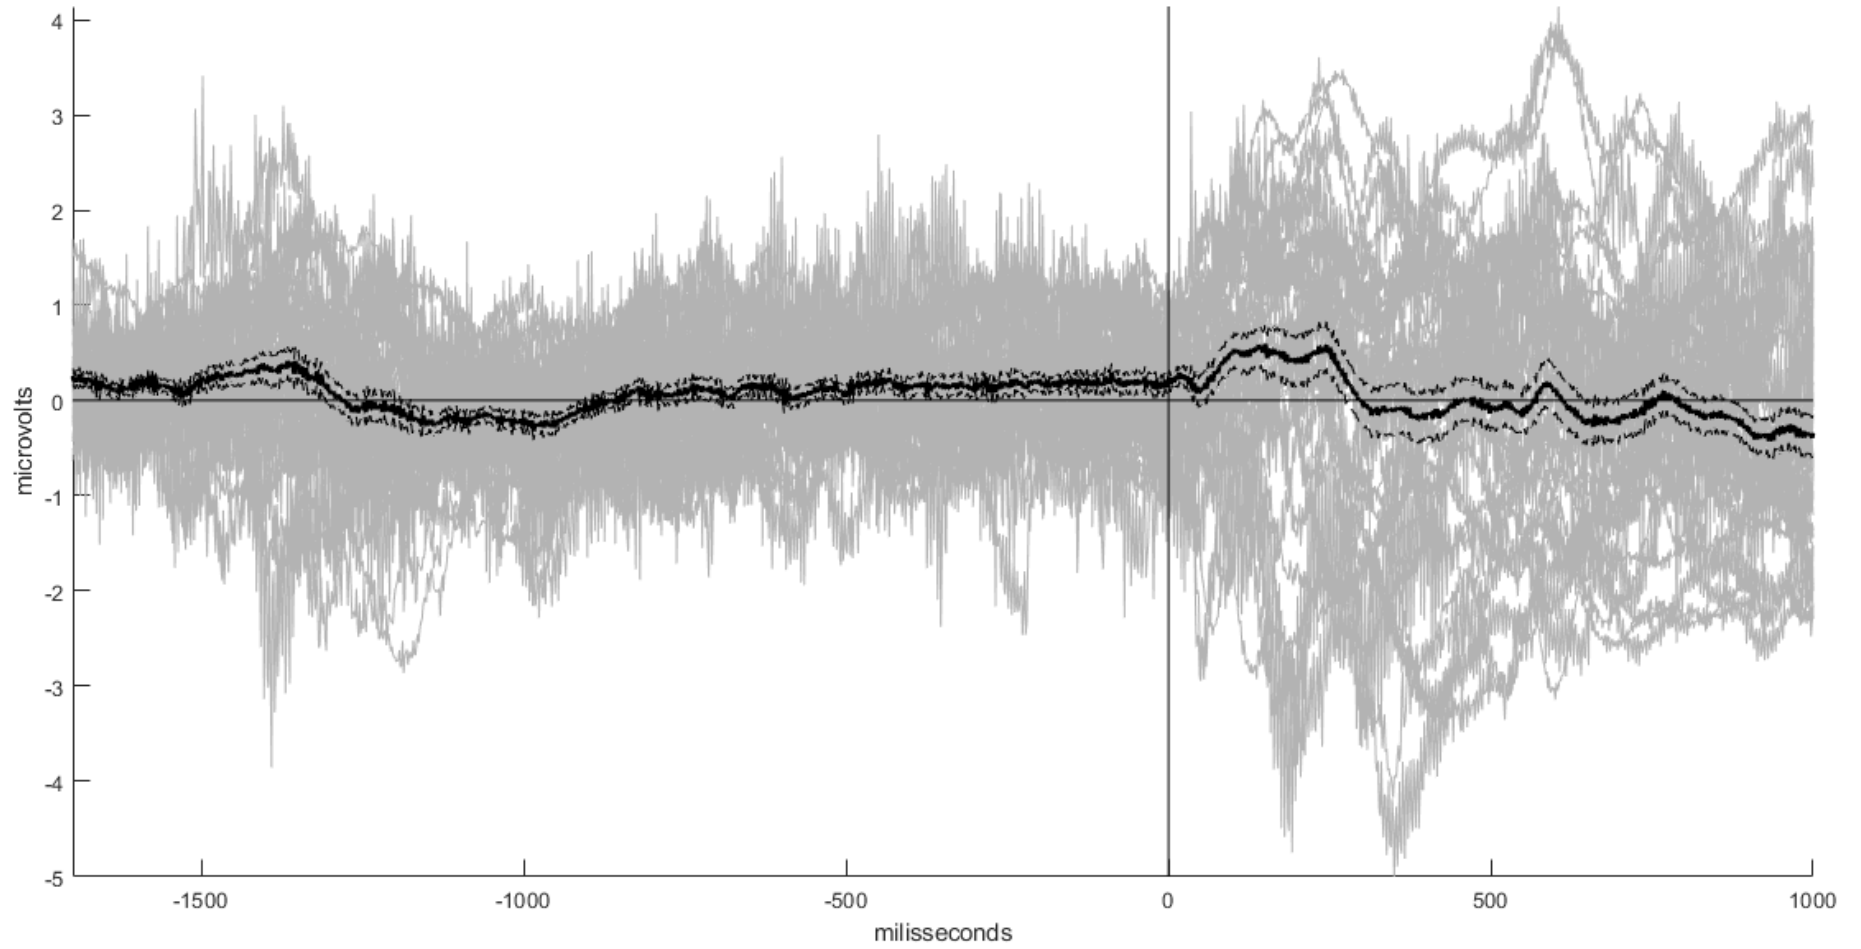

P3

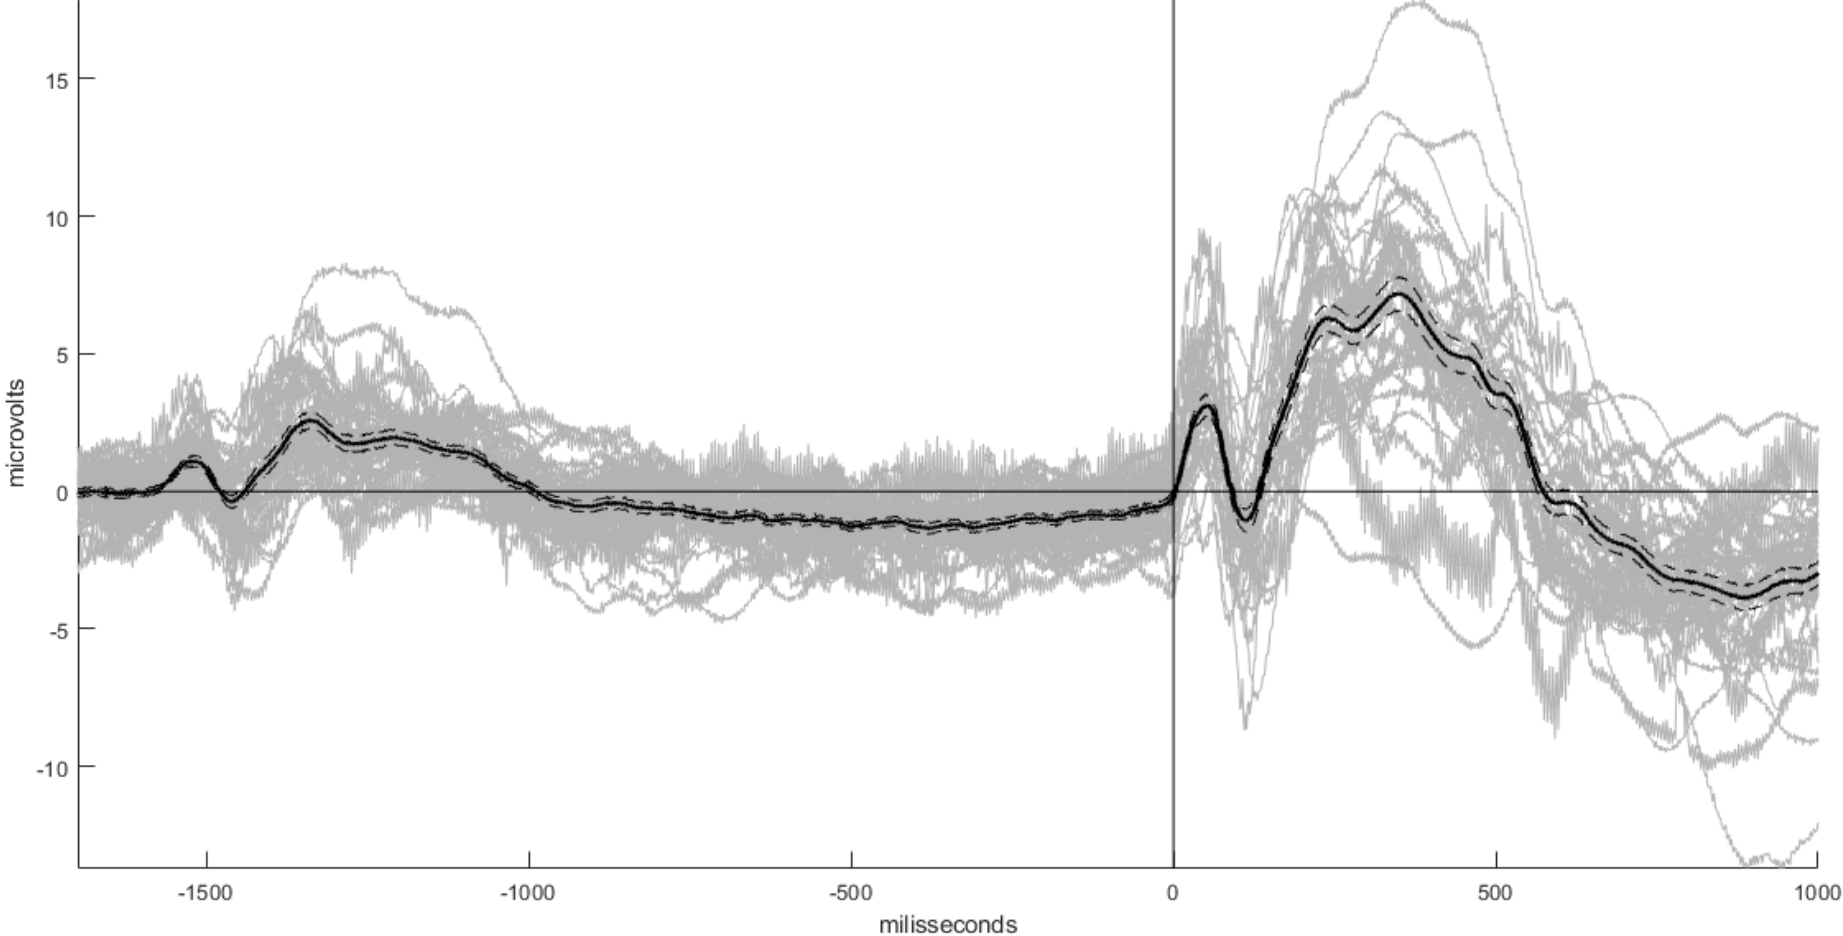

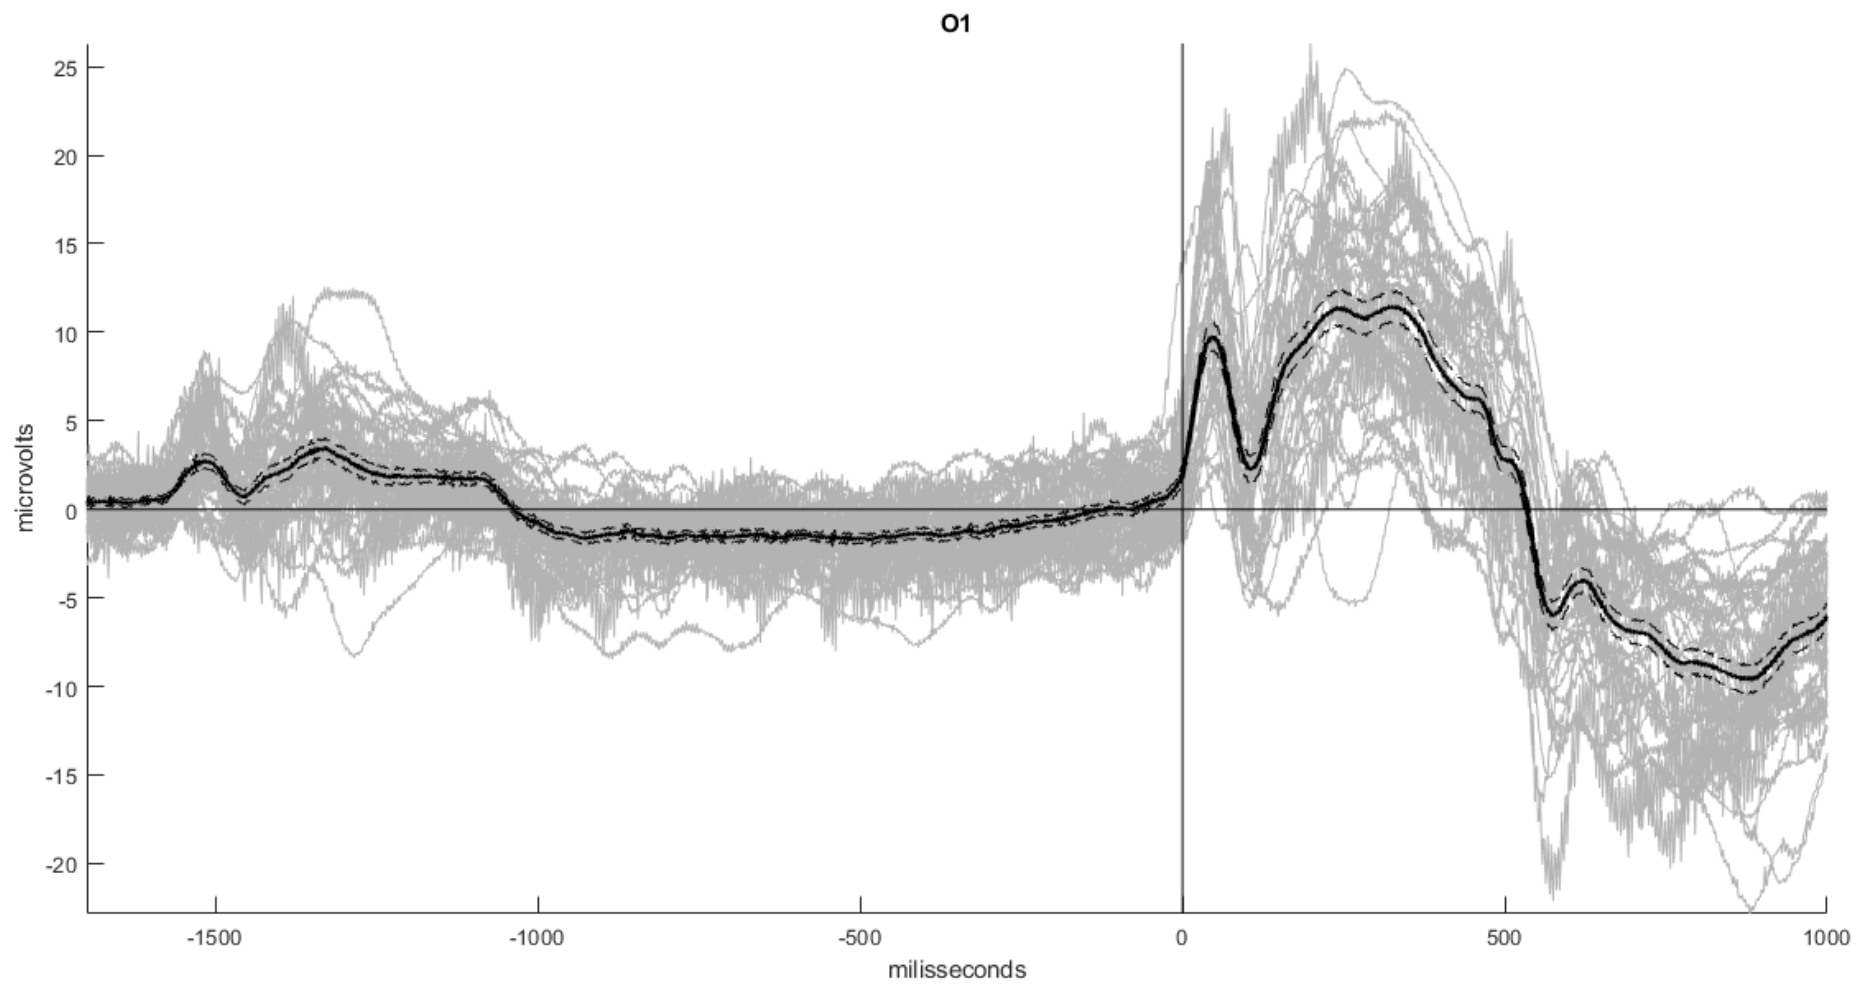



F8

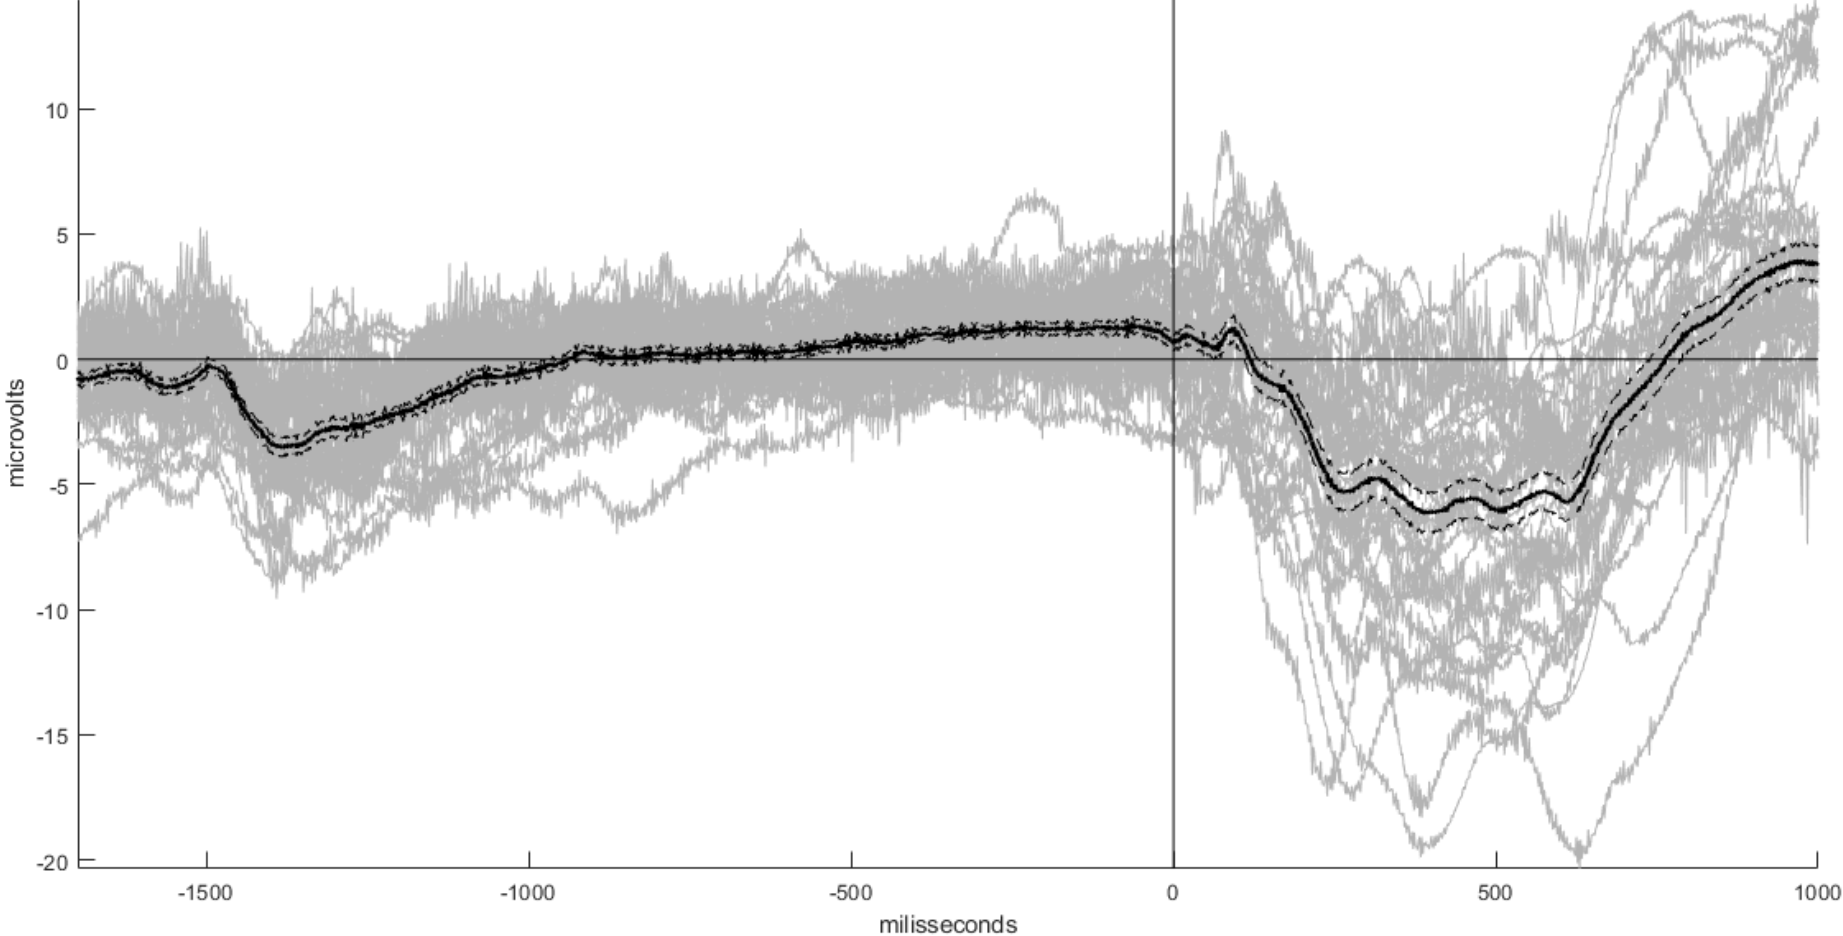

T4

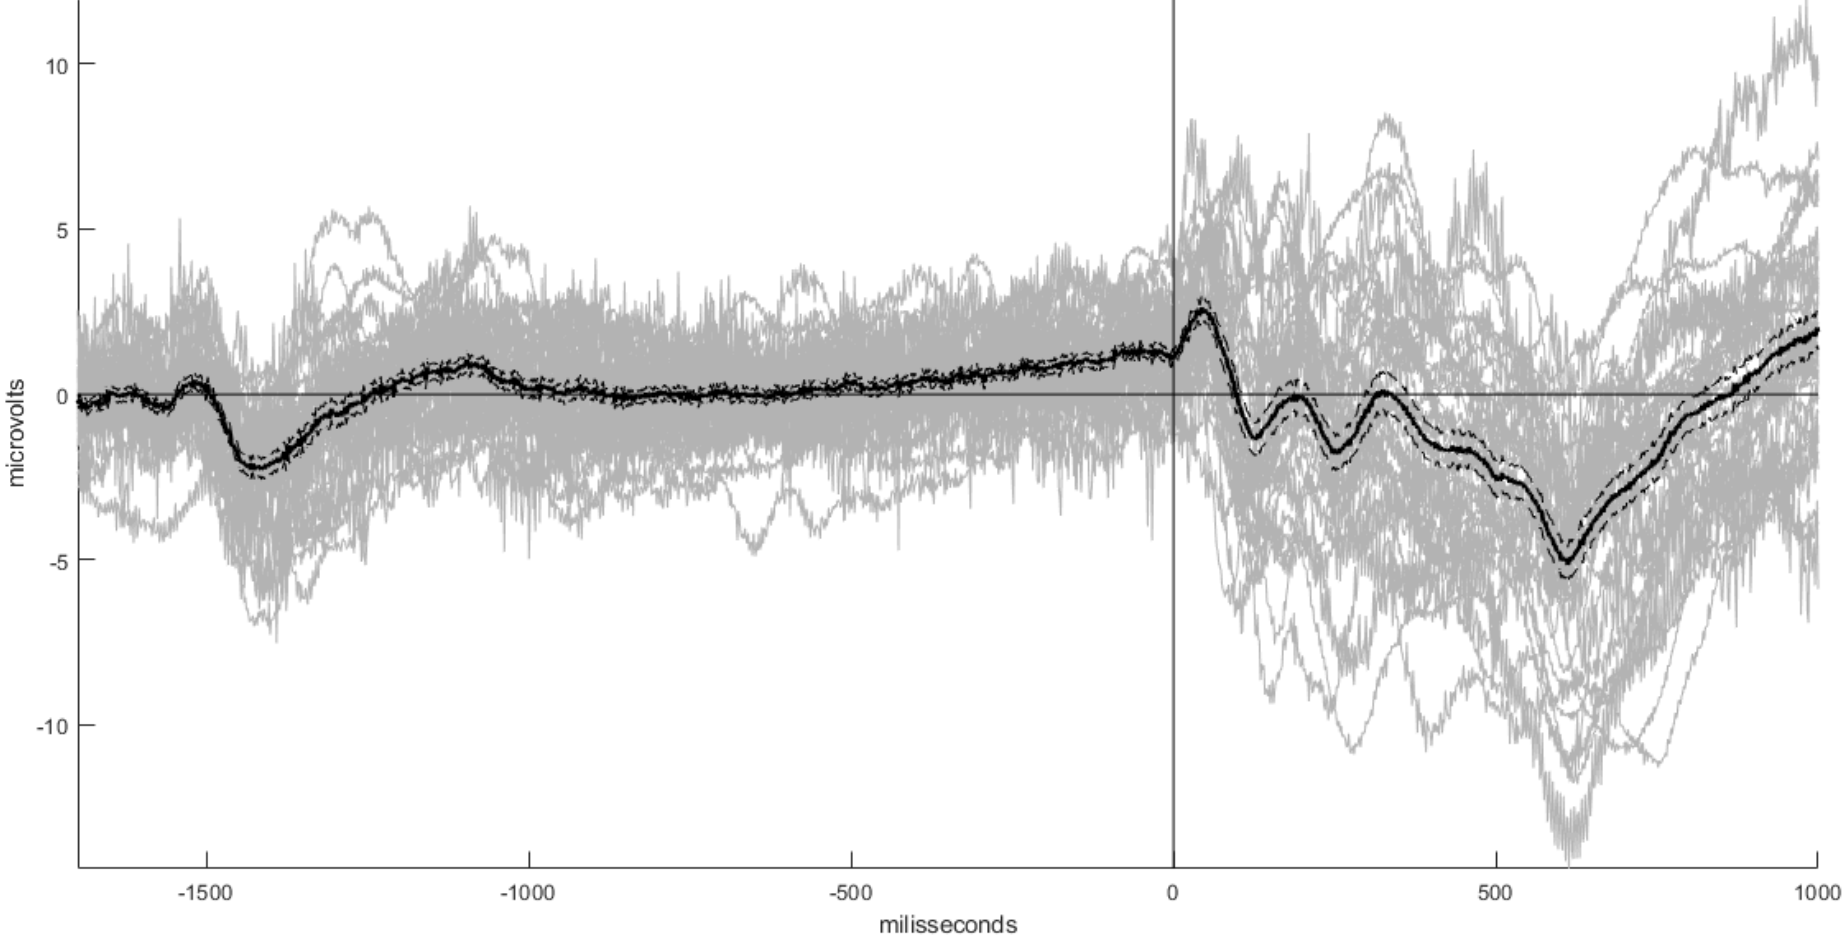

T6

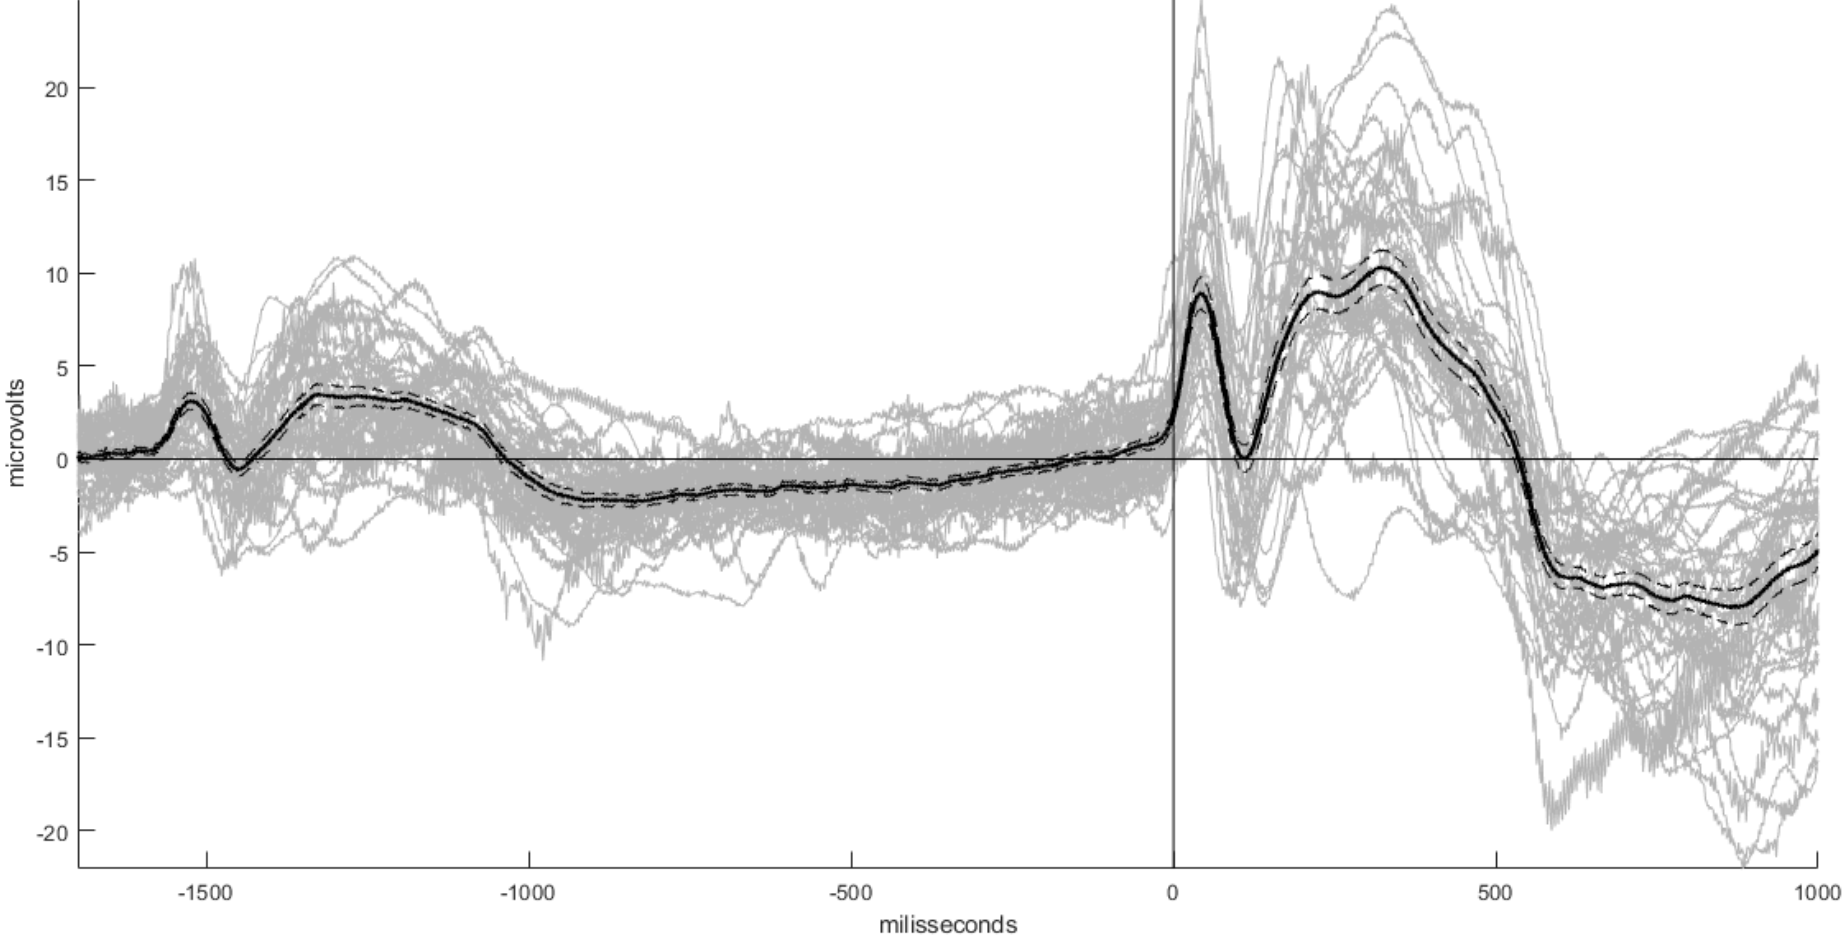

Fp2

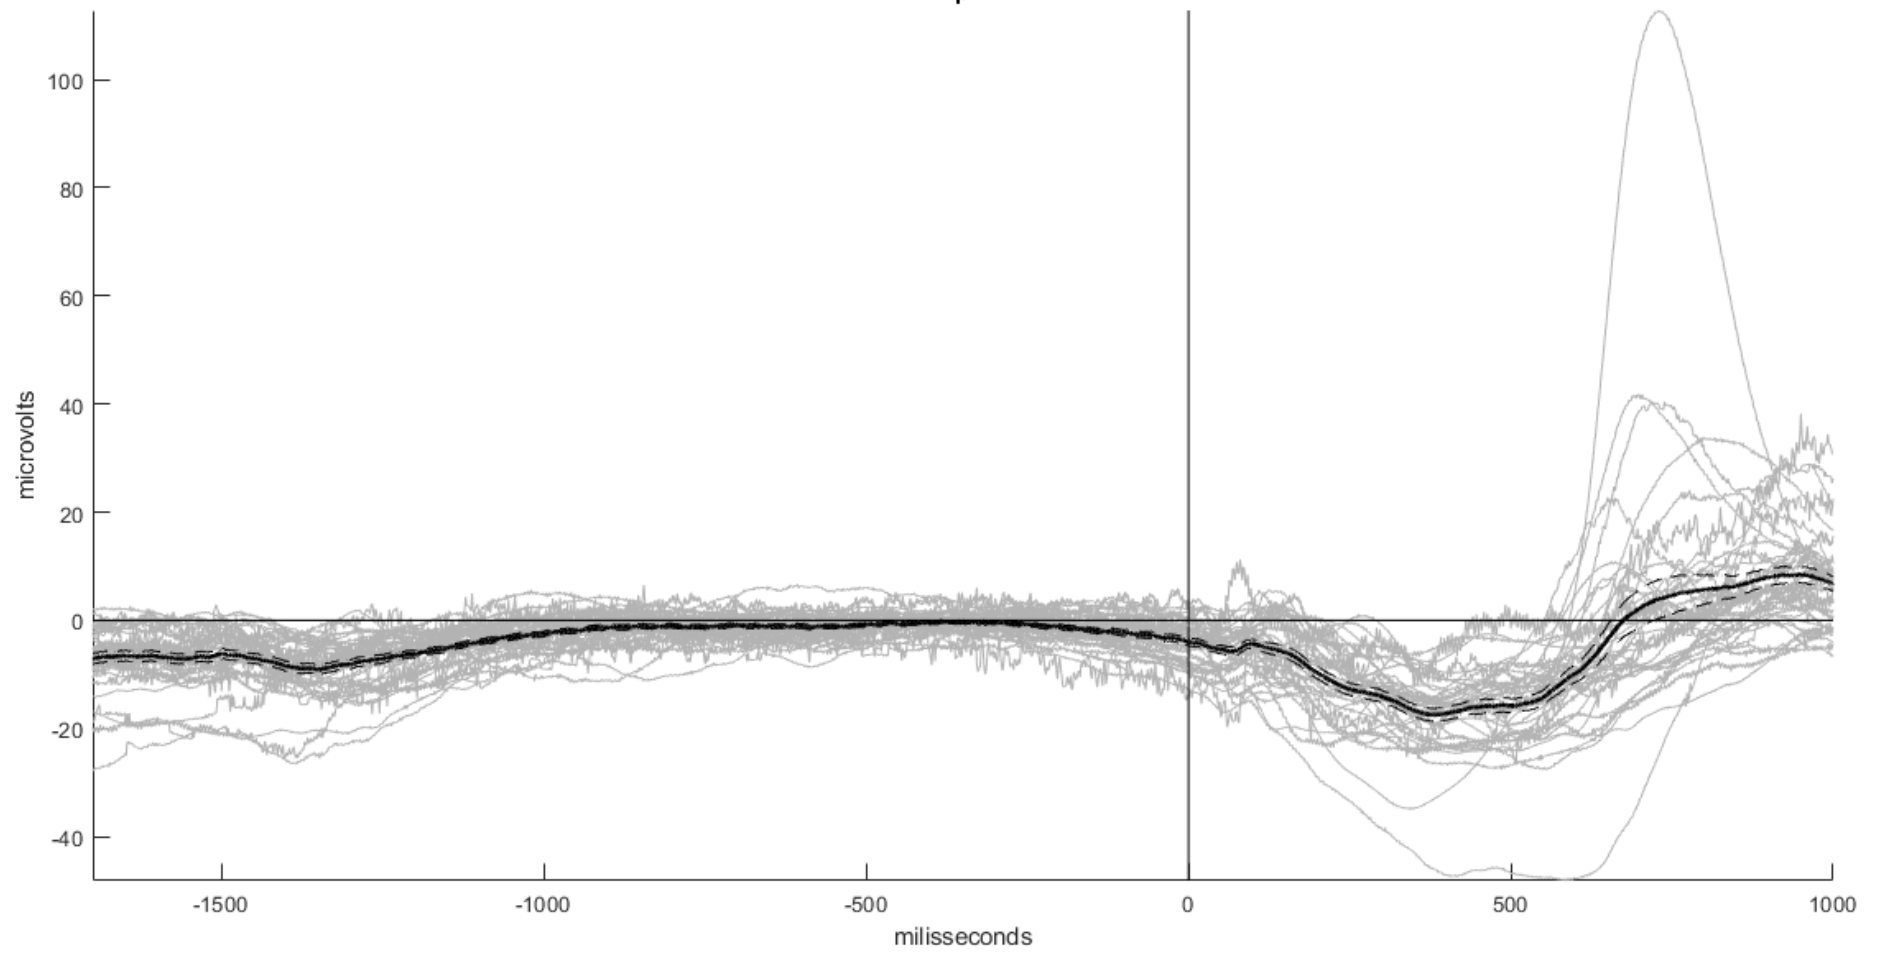

F4

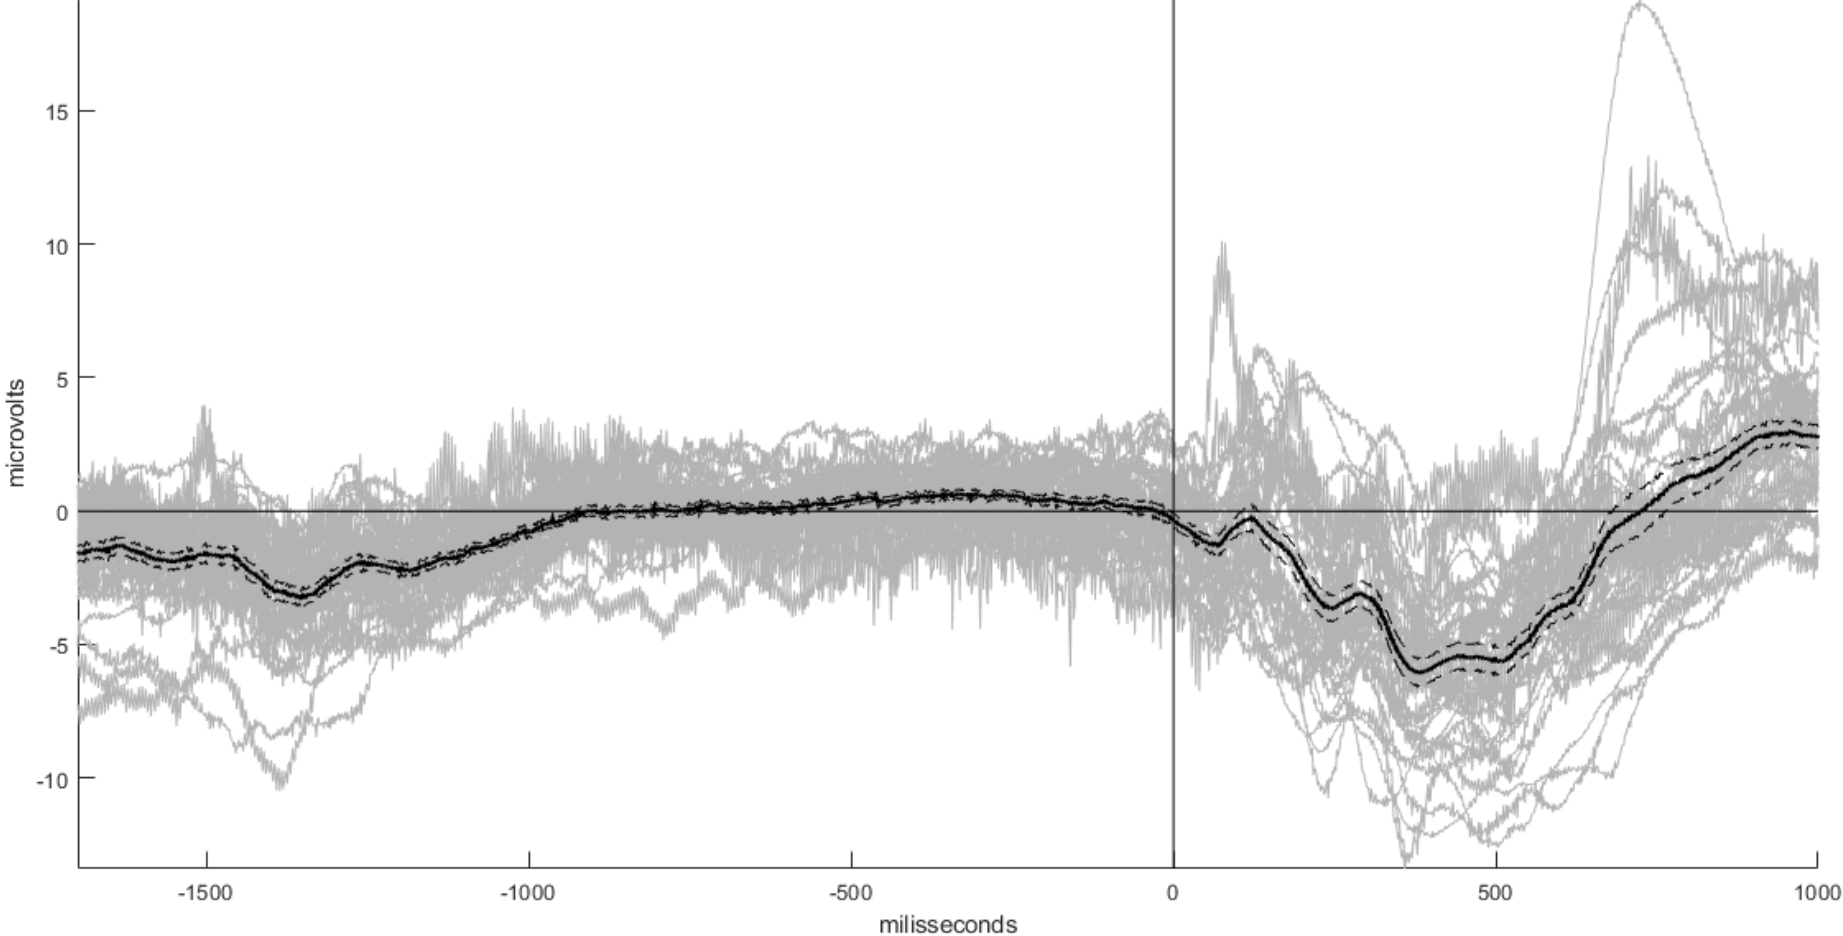

P4

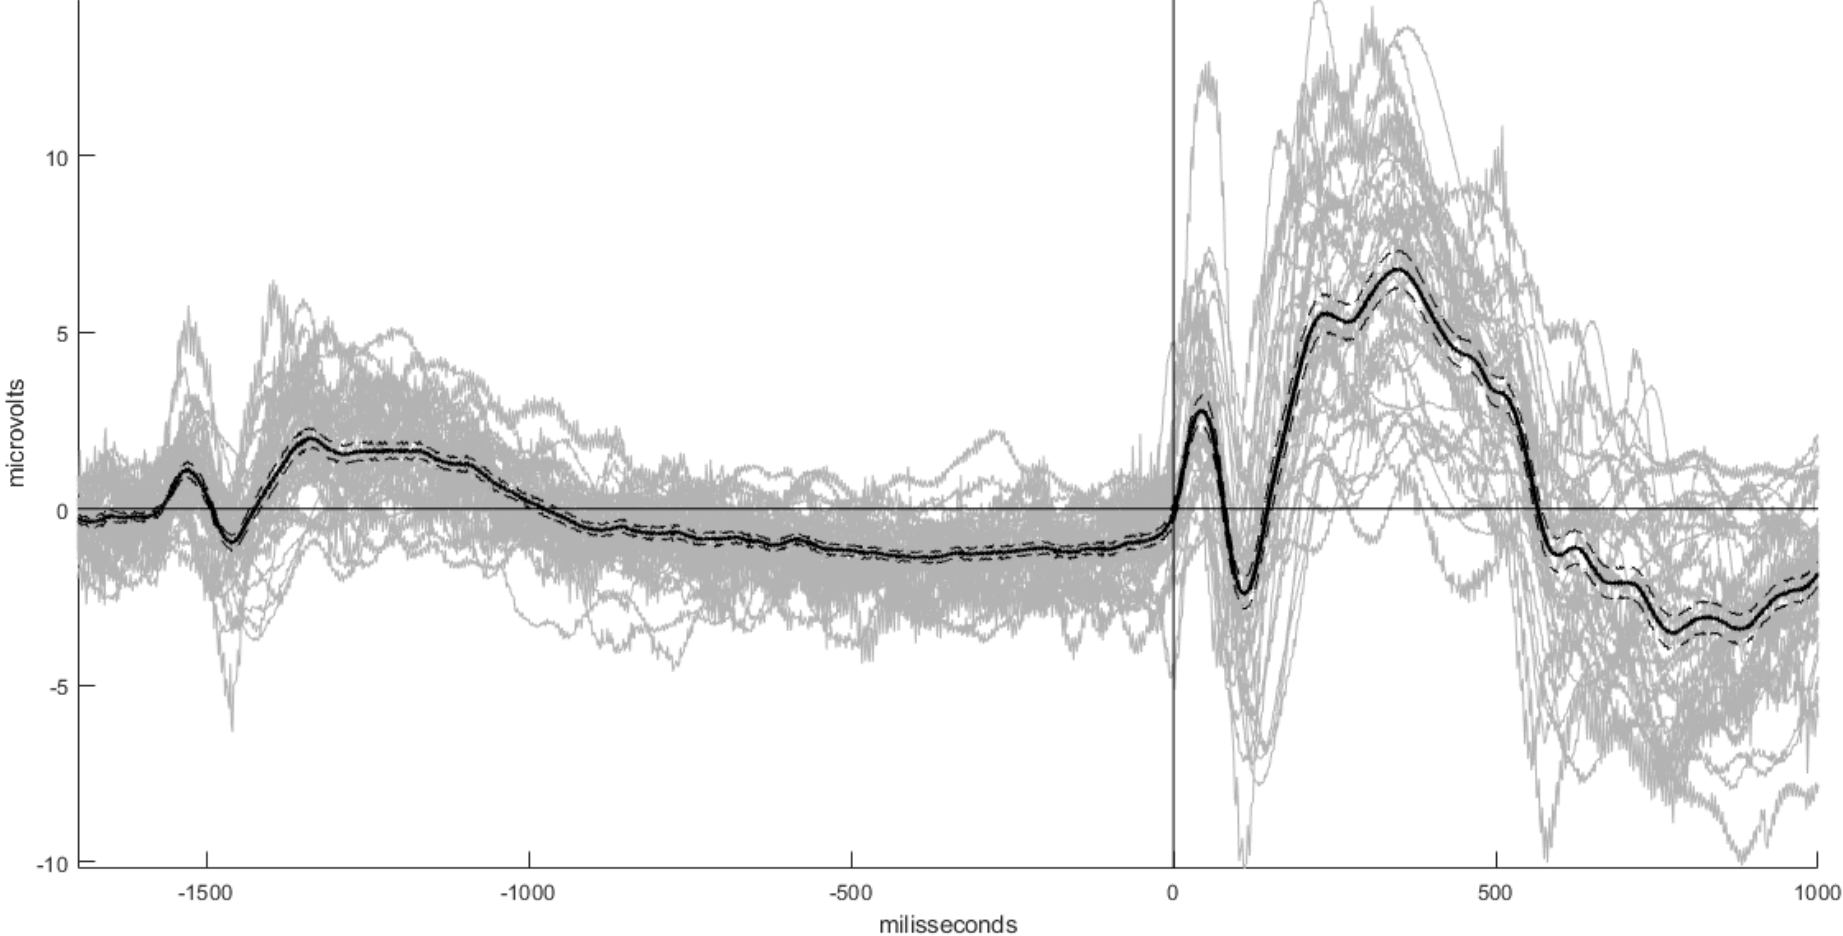

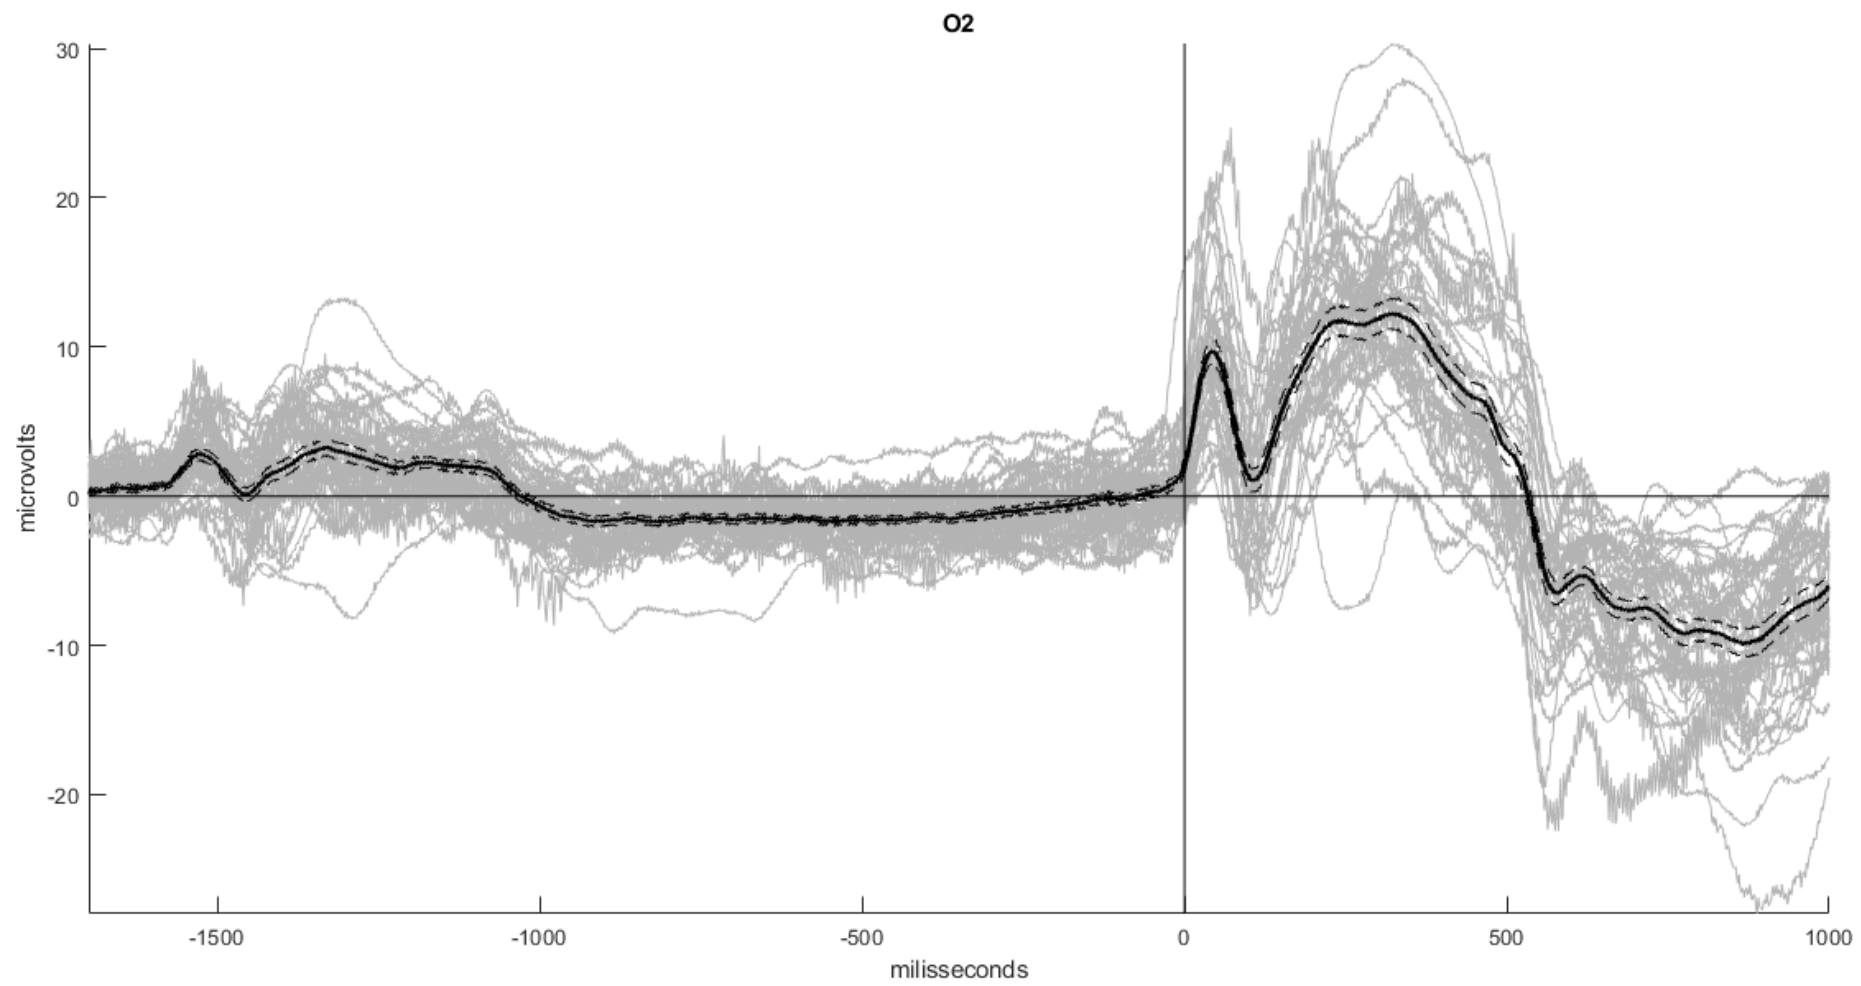

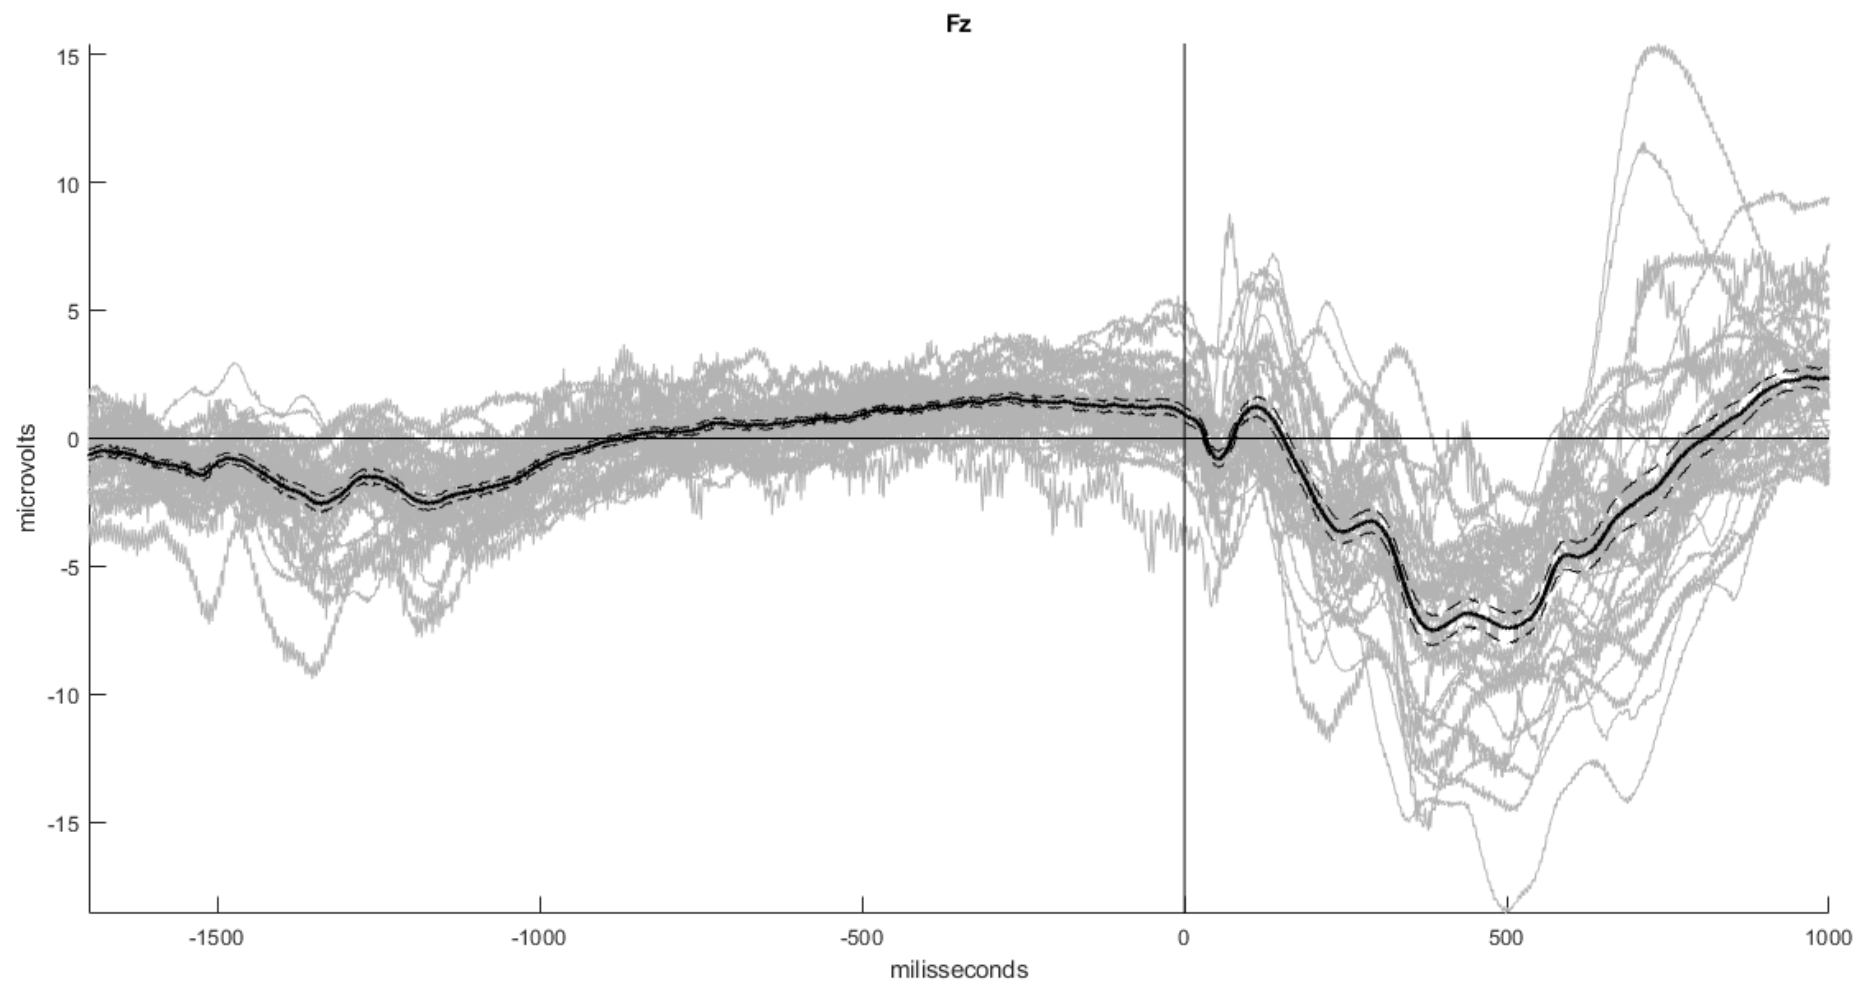



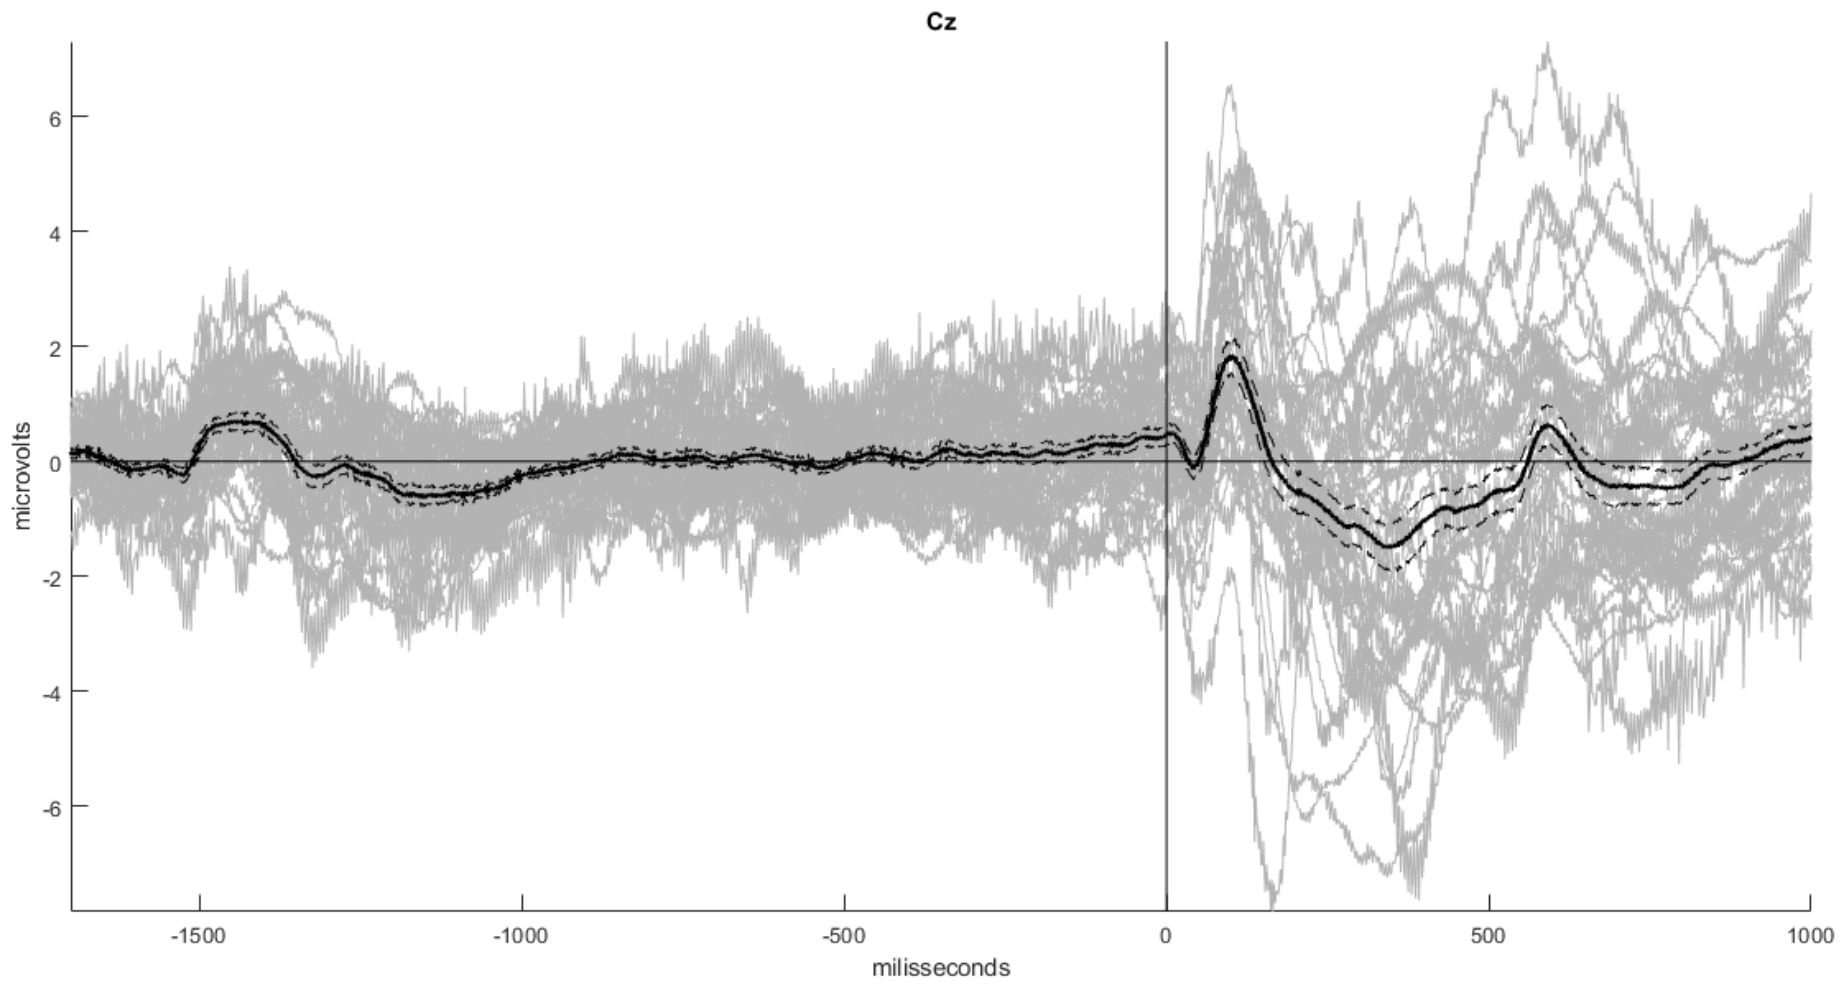

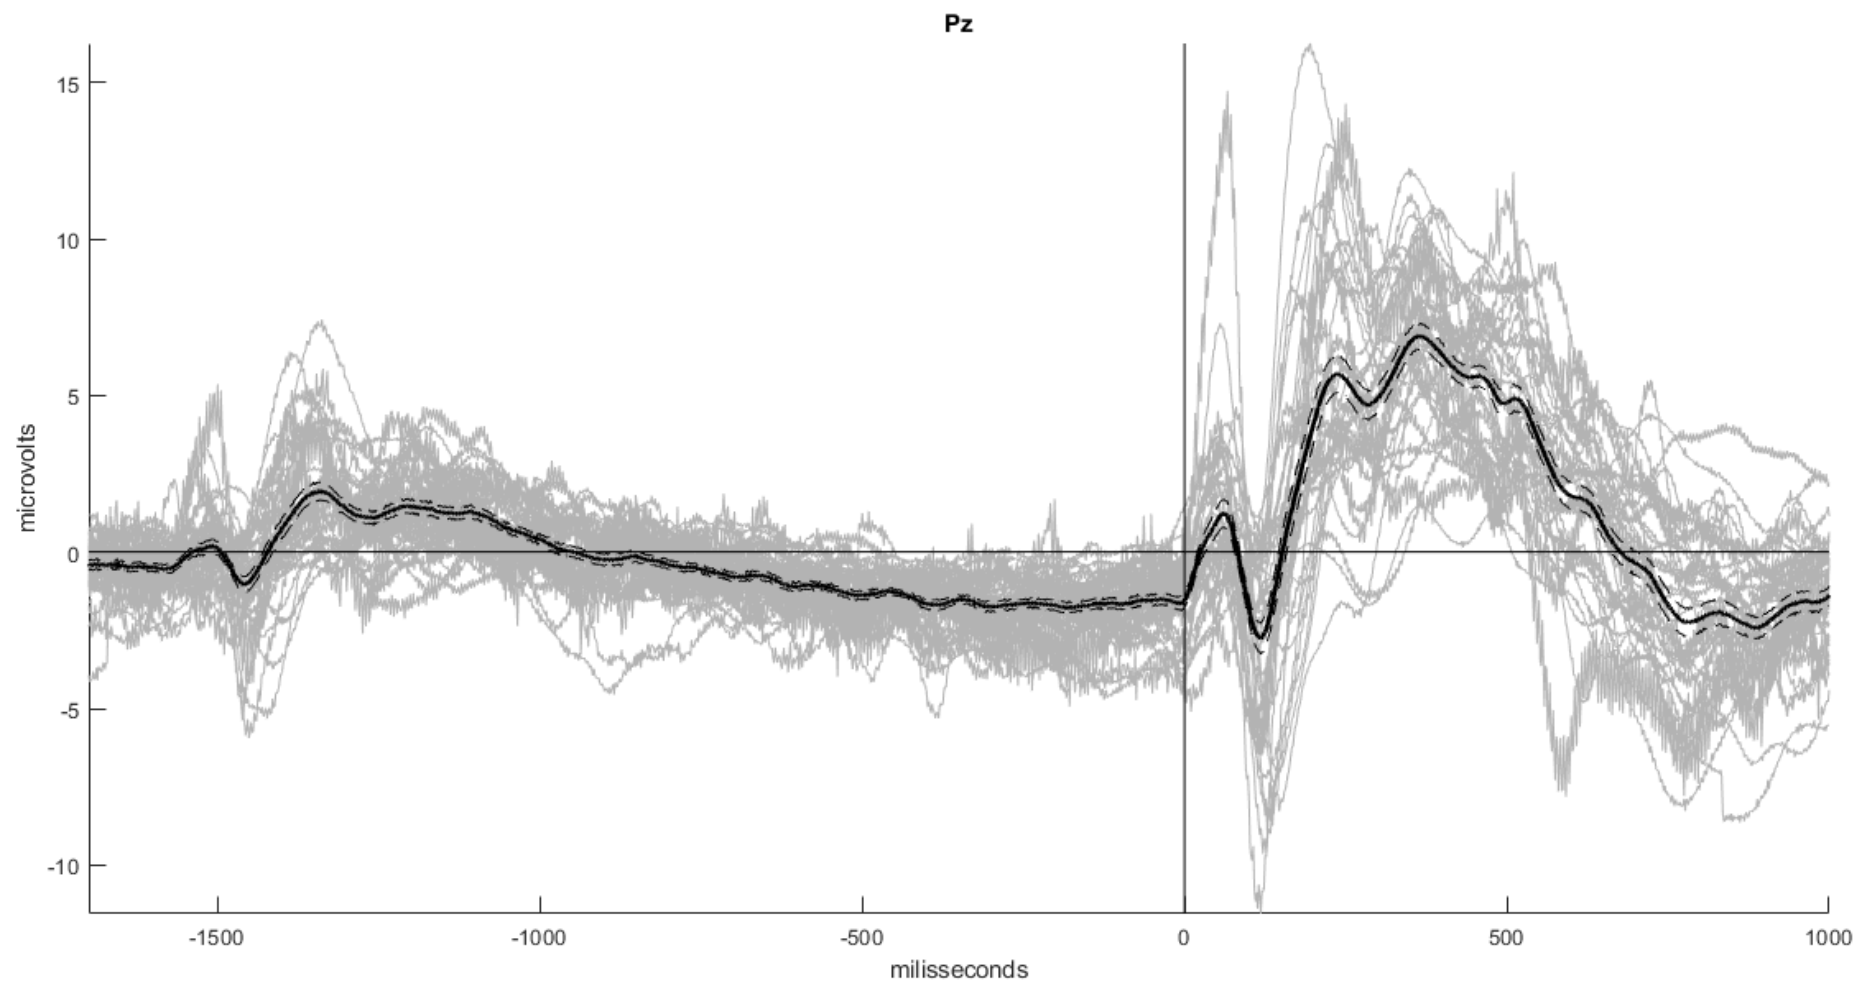

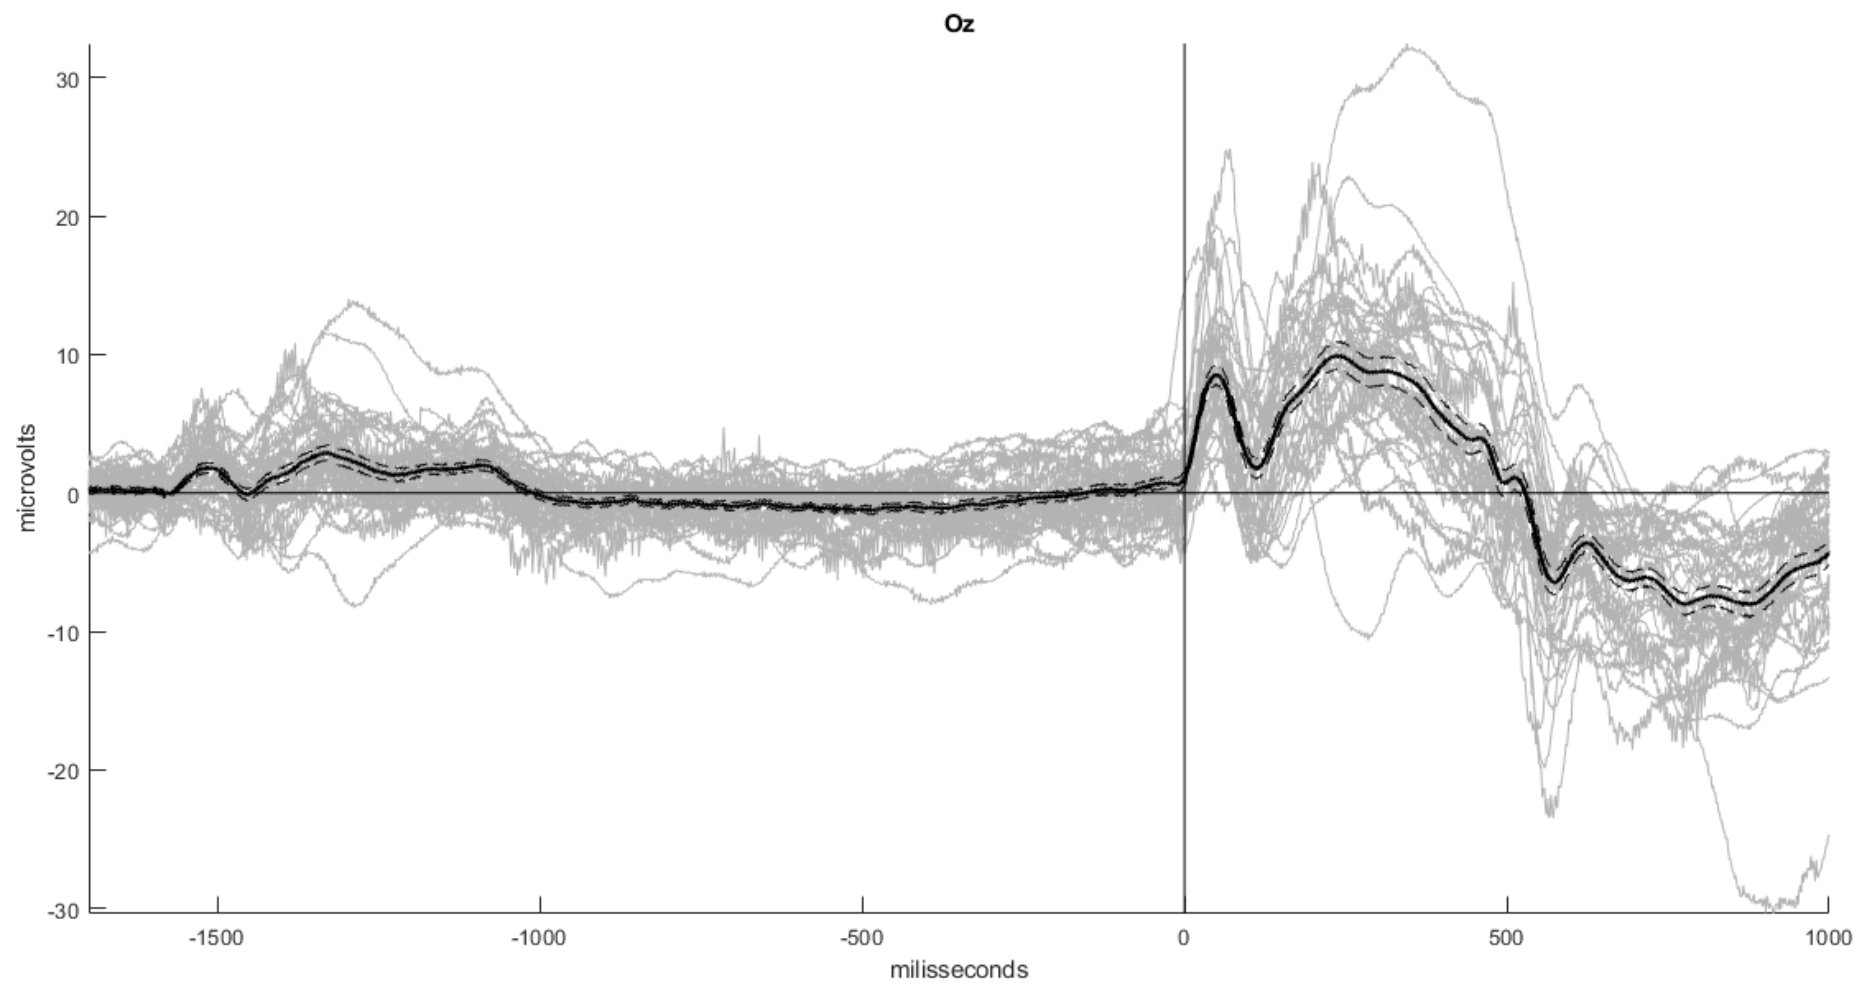

Supplement: Suppl_figure_S1.pdf [file Suppl_figure_S1.pdf]
