# Supplementary material for: Estimating biological accuracy of DSM for attention deficit/hyperactivity disorder based on multivariate analysis for small samples
Source: PeerJ journal article supplement (doi:10.7717/peerj.7074), 2019-06-12

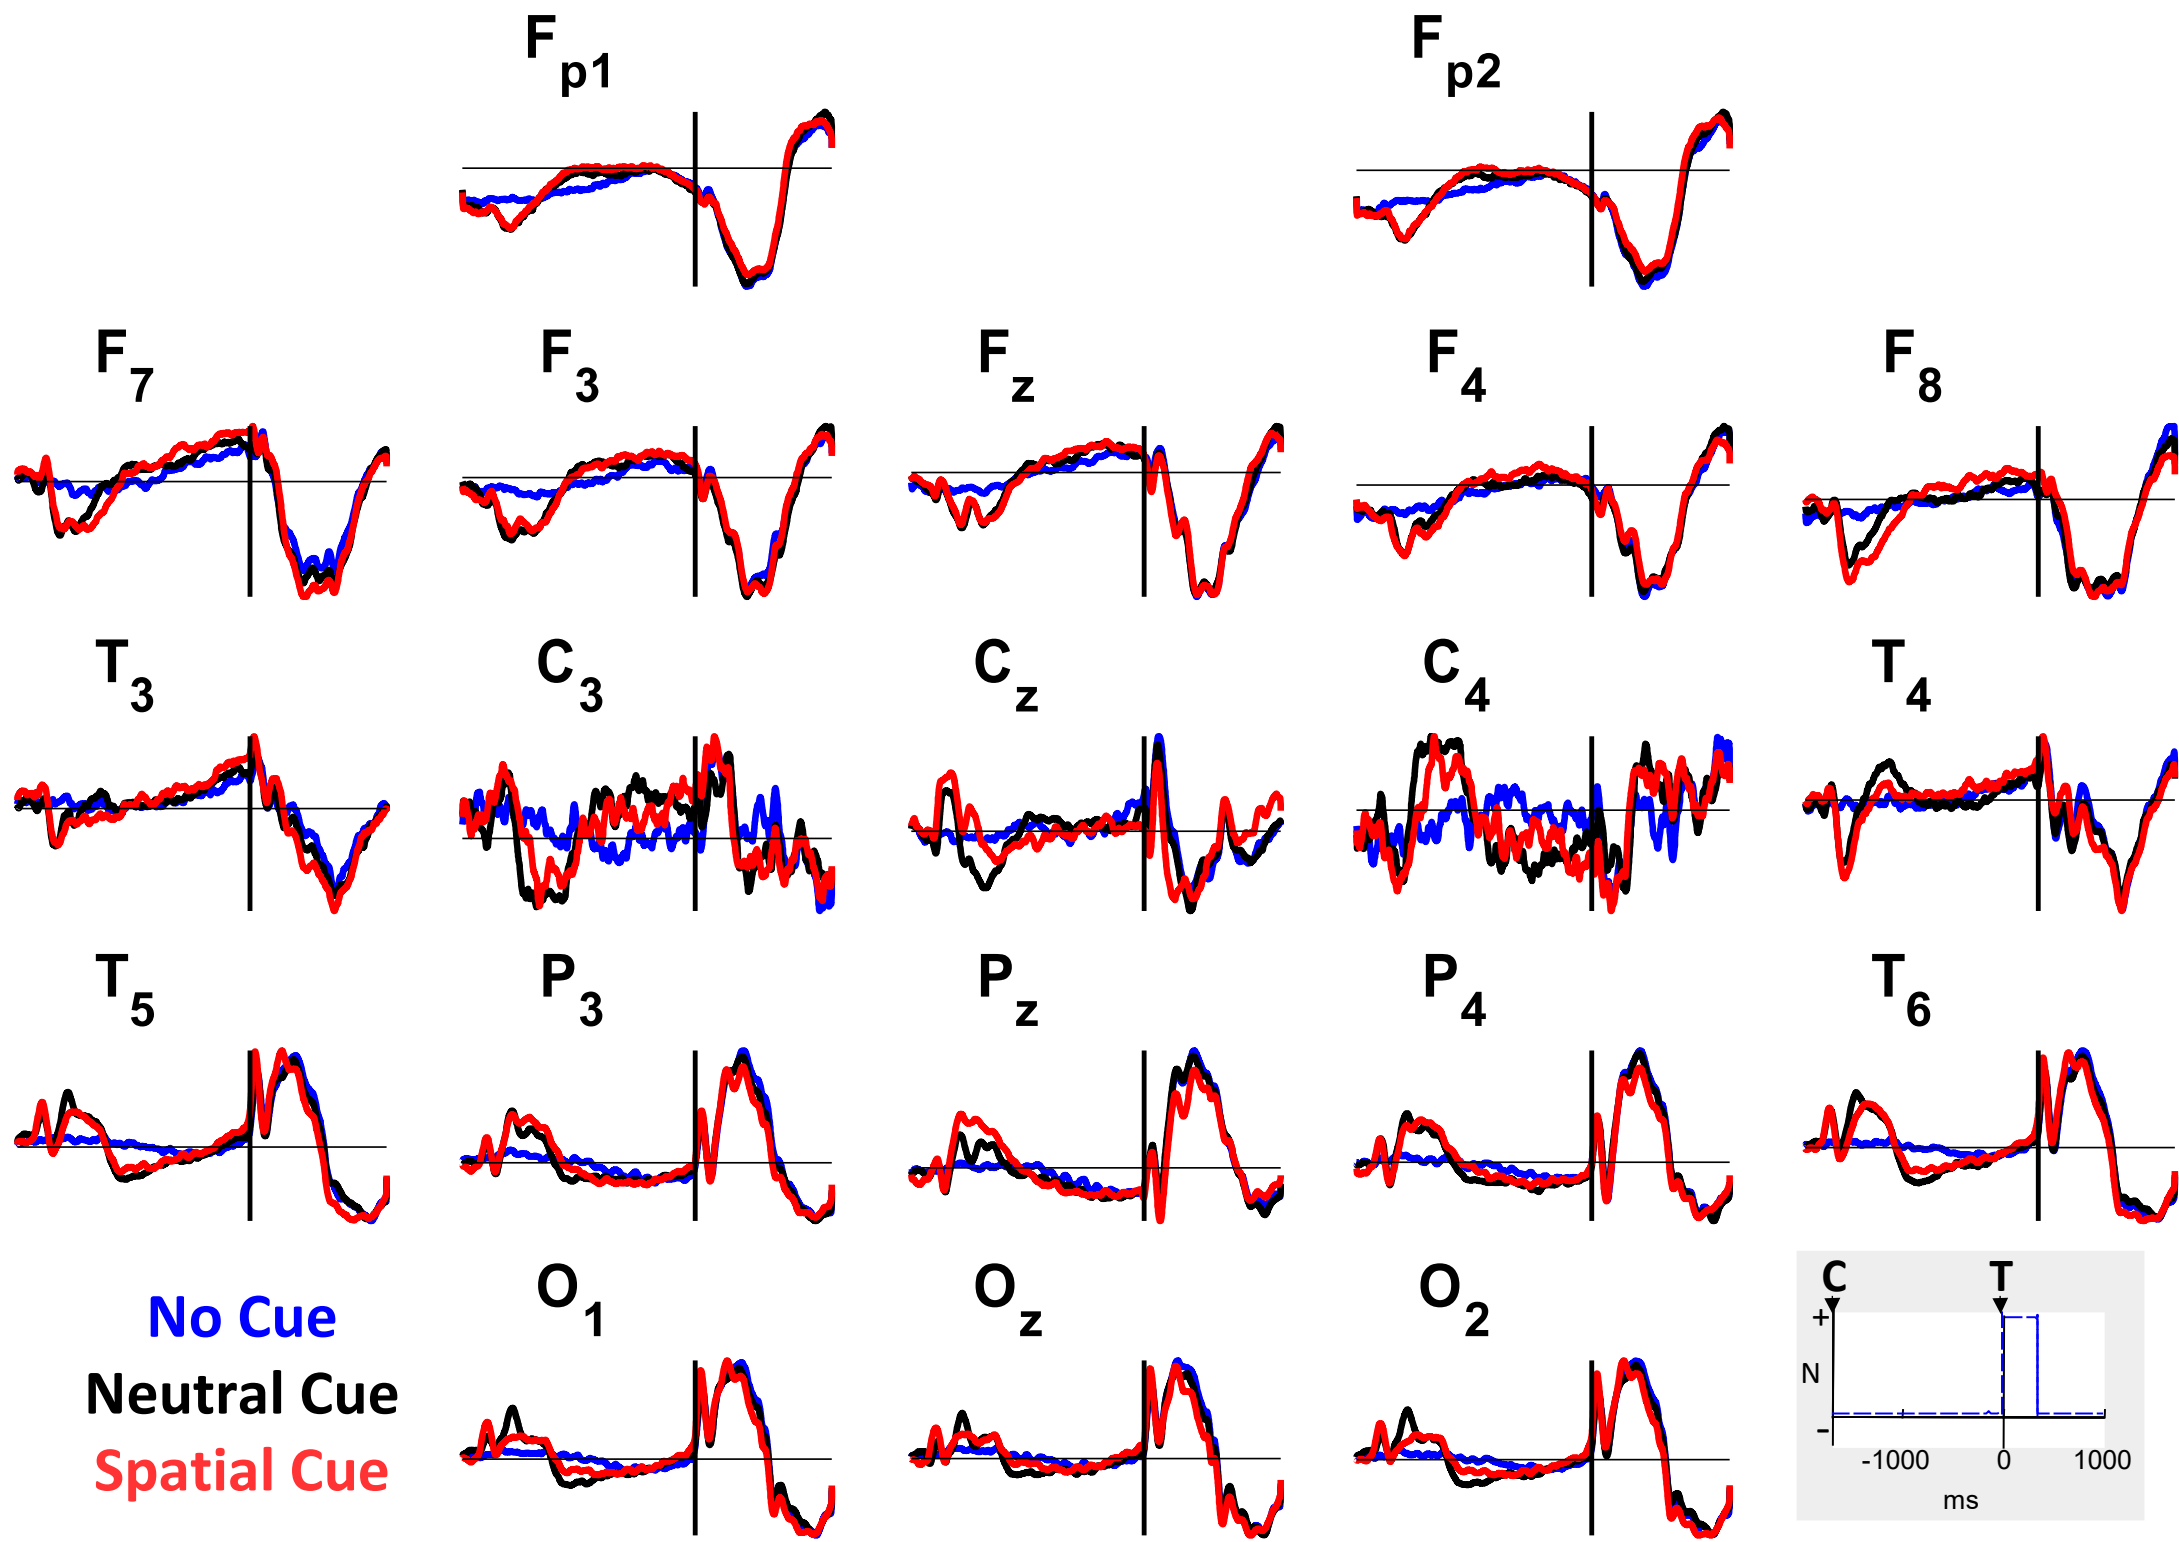

Supplement: suppl_figure_S2.pdf [file suppl_figure_S2.pdf]
