# Supplementary material for: Estimating biological accuracy of DSM for attention deficit/hyperactivity disorder based on multivariate analysis for small samples
Source: PeerJ. 2019 Jun 12;7:e7074. doi: 10.7717/peerj.7074 (PMC6571005; doi:10.7717/peerj.7074)
Supplement: Supplemental Information 2 — Inference of the magnitude of agreement between two categorical data (in this case, subject classification according to DSM and to biological/behavioral variables in the dataset). [file peerj-07-7074-s002.xls]

## Sheet: S3
	Calculating the Kappa Index
